# Supplementary material for: Positive density dependence acting on mortality can help maintain species-rich communities
Source: eLife journal article supplement (doi:10.7554/elife.57788), 2020-06-18
Supplement: figures [file elife-57788-figures-v1.pdf]

---

## Figures and figure supplements

Positive density dependence acting on mortality can help maintain species-rich communities

**Thomas G Aubier**

| Conspecific positive density dependence associated with:                                                                                                                                                                                                                                                                               |                                                                                                                                                                                                                                                                                                                  |                                                                                                                                                                                                                                                                                                                        |
|----------------------------------------------------------------------------------------------------------------------------------------------------------------------------------------------------------------------------------------------------------------------------------------------------------------------------------------|------------------------------------------------------------------------------------------------------------------------------------------------------------------------------------------------------------------------------------------------------------------------------------------------------------------|------------------------------------------------------------------------------------------------------------------------------------------------------------------------------------------------------------------------------------------------------------------------------------------------------------------------|
| increased reproduction                                                                                                                                                                                                                                                                                                                 | reduced mortality                                                                                                                                                                                                                                                                                                |                                                                                                                                                                                                                                                                                                                        |
| <ul style="list-style-type: none"><li>● increased probability of finding a mate<br/>ex: copepod, insect- or wind-pollinated plants</li><li>● increased probability for sperm and egg to meet (if external reproduction)<br/>ex: starfish, sea urchin</li><li>● increased success of rearing youngs<br/>ex: wild dog, meerkat</li></ul> | <b>reduction of the risk of predation</b> <ul style="list-style-type: none"><li>● increased vigilance at the group level<br/>ex: meerkat, bighorn sheep, baboon</li><li>● reduced vulnerability of individual prey (dilution)<br/>ex: aposematic prey species, mussel, cod, starfish, woodland caribou</li></ul> | <b>reduction of other sources of mortality</b> <ul style="list-style-type: none"><li>● increased foraging efficiency<br/>ex: wild dog, black-browed albatross, chimpanzee, wolf, social spider</li><li>● improved resistance against environmental stress<br/>ex: marmot, mussell, grass in arid environment</li></ul> |

**Figure 1.** Mechanisms causing conspecific positive density dependence, and affecting reproduction or mortality. For references and for a more exhaustive list, see the reviews by *Courchamp et al., 1999*; *Stephens et al., 1999*; *Berec et al., 2007*; *Kramer et al., 2009*. Note that two or more mechanisms causing positive or negative density dependence can occur simultaneously (*Berec et al., 2007*).

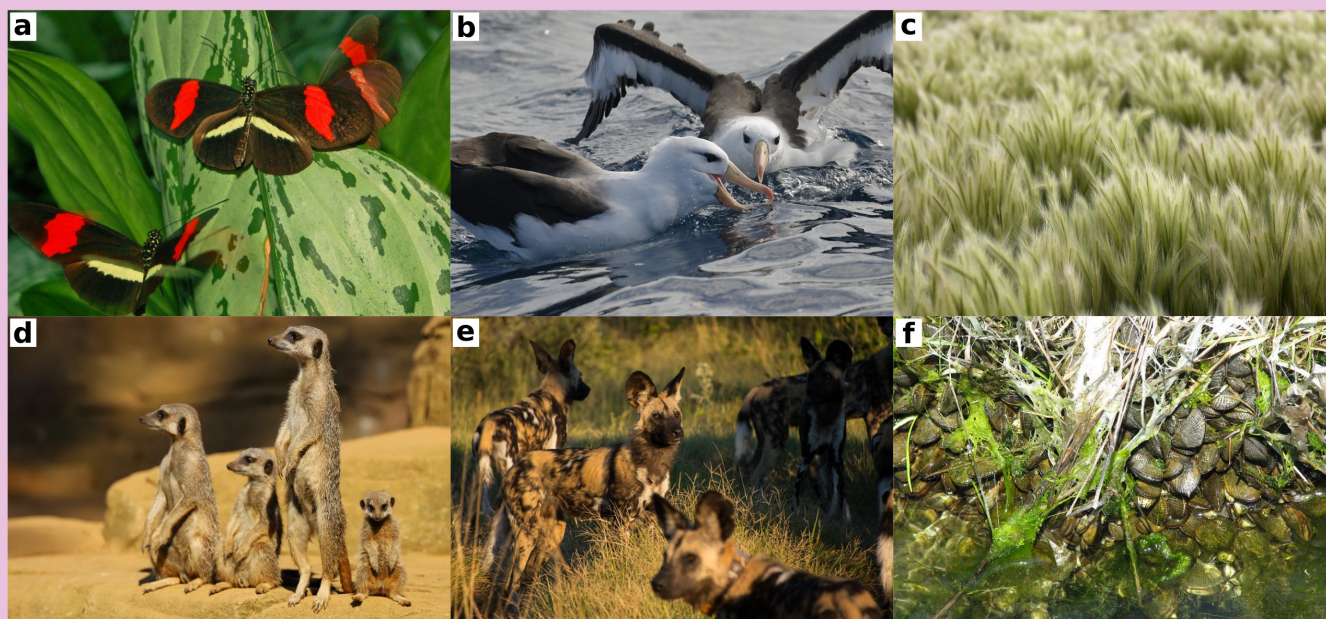

**Figure 2.** Example of organisms undergoing conspecific positive density dependence that associates with reduced mortality. (a) *Heliconius* butterflies are aposematic (toxic and conspicuous) and therefore benefit from reduced predation when conspecifics are abundant. (b) Black-browed albatrosses in large flocks benefits from increased foraging efficiency and therefore from increased survival (*Grünbaum and Veit, 2003*). (c) Bottlebrush squirreltail in high density have a high survival rate and a high establishment success in arid grasslands (*Sheley and James, 2014*). (d) Meerkats in large group benefit from increased vigilance at the group level, reducing the risk of predation (*Clutton-Brock et al., 1999*). (e) Wild dogs in large group benefit from a high hunting success and defend effectively their kill against kleptoparasitism, thereby increasing their survival (*Fanshawe and Fitzgibbon, 1993; Carbone et al., 1997*). (f) Ribbed mussels in high density benefit from reduced crab predation and from improved winter ice resistance (*Bertness and Grosholz, 1985*). Photo credits: (a) Ettore Balocchi; (b) Ed Dunens; (c) Jeffry B. Mitton; (d) Ronnie Macdonald; (e) Barbara Evans; (f) Kerry Wixted.

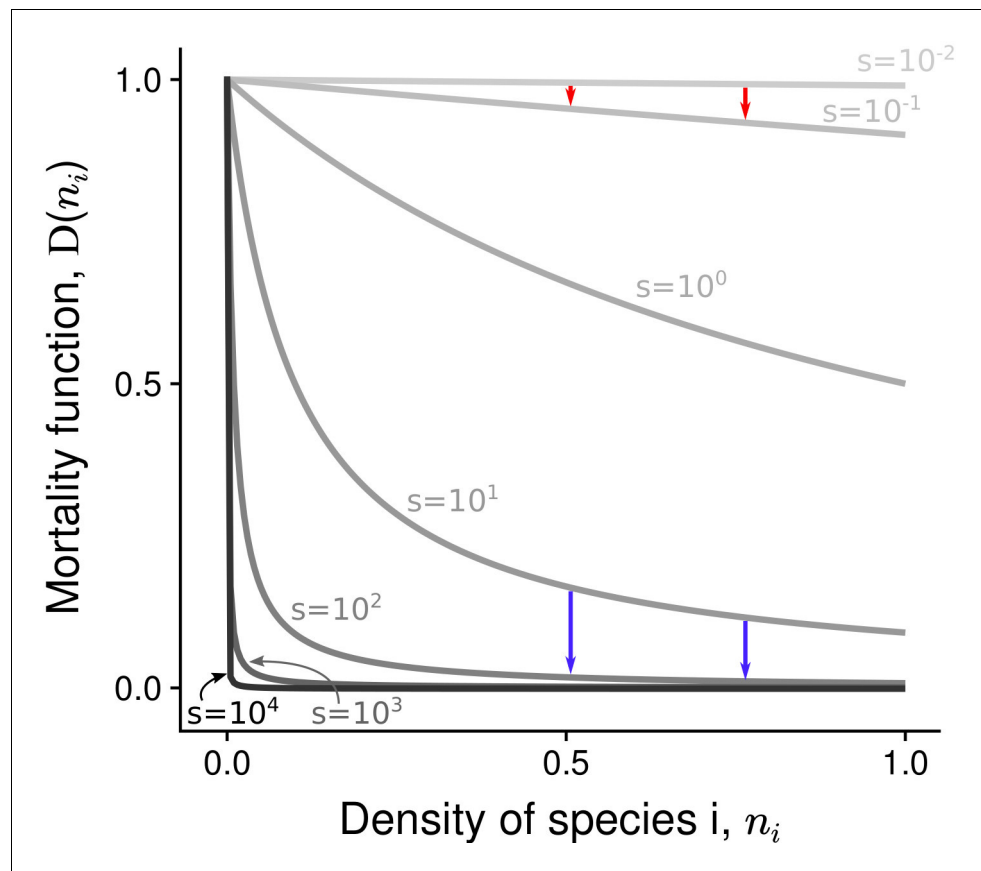

**Figure 3.** Non-linear mortality functions with different density-dependence factors ( $s$ ). Pairs of arrows illustrate the non-linear effect of increased  $s$  on mortality reduction. Depending on the value of the density-dependence factor  $s$ , the most abundant species either benefits the most (red arrows) or the least (blue arrows) from increased  $s$ .



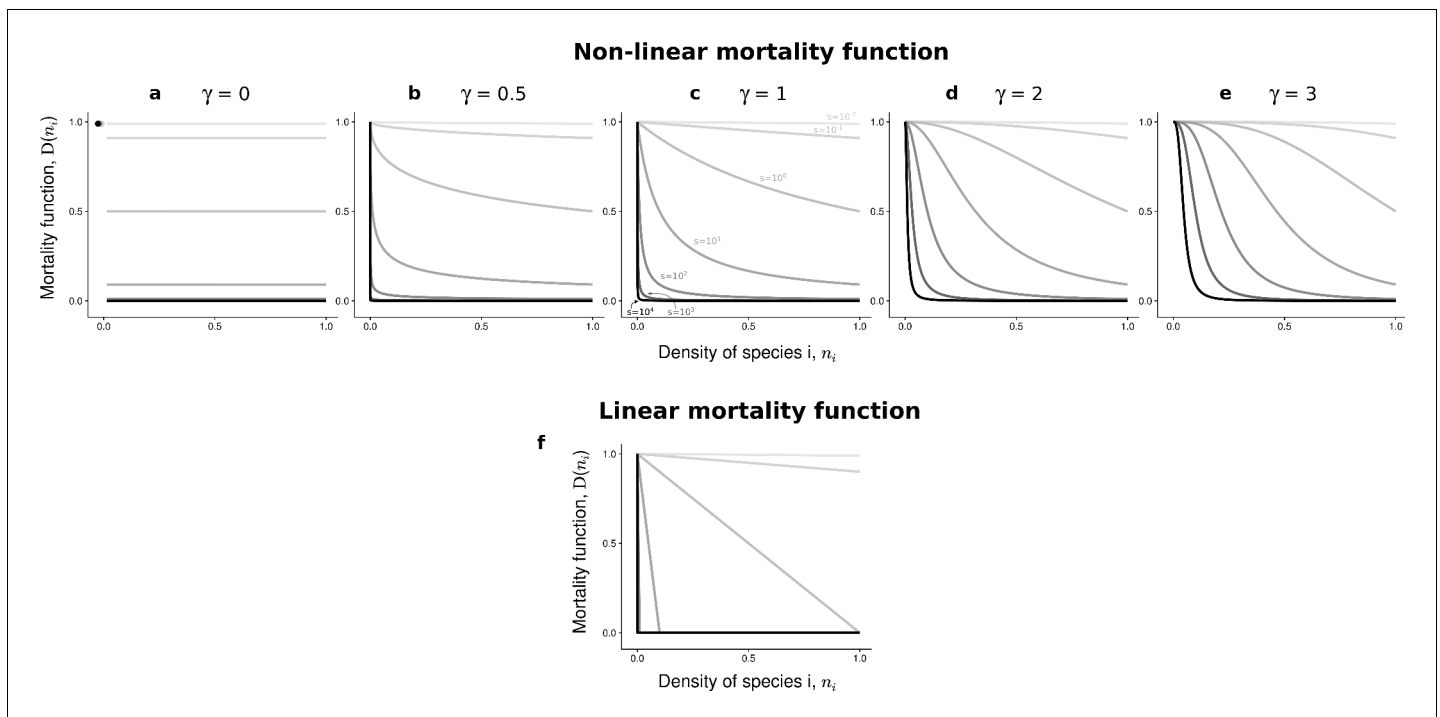

**Figure 3—figure supplement 1.** Non-linear and linear mortality functions with different density-dependence factors ( $s$ ) tested in supplementary analyses. Non-linear and linear mortality functions with different density-dependence factors ( $s$ ) tested in supplementary analyses. In the case of non-linear mortality functions,  $D(n_i) = \frac{1}{1+s n_i^\gamma}$  is implemented (assuming  $K = 1$ , otherwise the scaling shown in **Supplementary file 1A** is incorrect), and different values of exponent  $\gamma$  making the curve sigmoidal are tested. For  $\gamma = 0$ ,  $D(n_i) = 1$  if  $n_i = 0$ ,  $D(n_i) = \frac{1}{1+s}$  otherwise (i.e. increased  $s$  associates with reduced mortality without density-dependence). In the case of linear mortality functions,  $D(n_i) = \max[0, 1 - s n_i]$  is implemented.

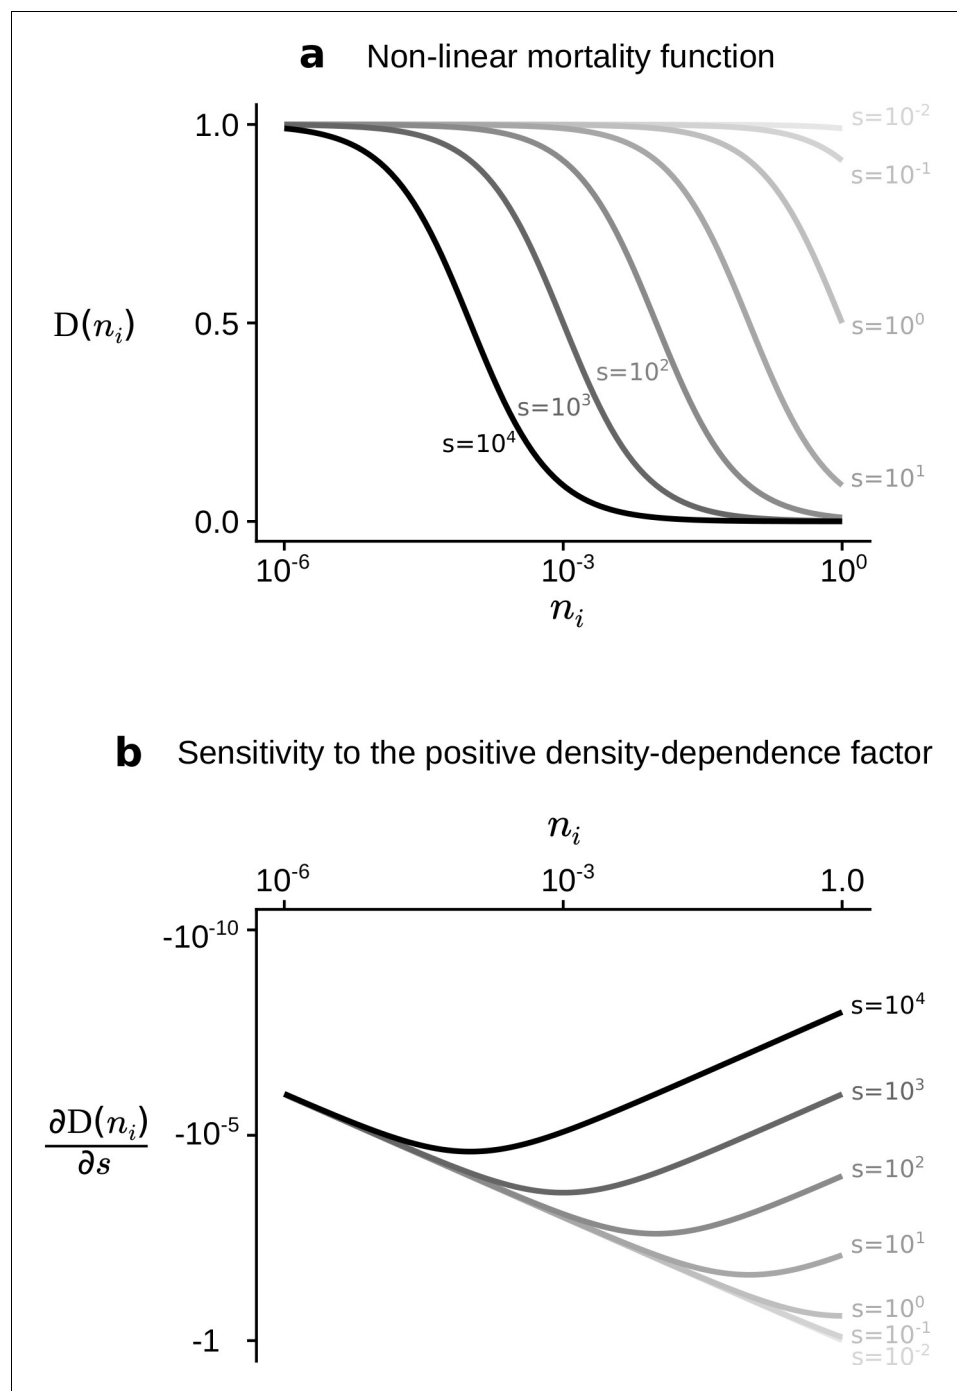

**Figure 3—figure supplement 2.** Sensitivity to increased density-dependence factor. Non-linear mortality function (a) and its sensitivity to increased density-dependence factor (b) for different density-dependence factors ( $s$ ). Note the use of logarithmic scales. The partial derivative is  $\frac{\partial D}{\partial s} = -\frac{n_i}{(1+s n_i)^2}$ , which is decreasing with  $n_i$  if  $n_i < 1/s$ , and is increasing with  $n_i$  if  $n_i > 1/s$ . Therefore, for increased density-dependence factor (increased  $s$ ), species at high density do not necessarily incur a strong decrease in mortality ( $\frac{\partial D}{\partial s}$  is not always lower for higher  $n_i$ ).

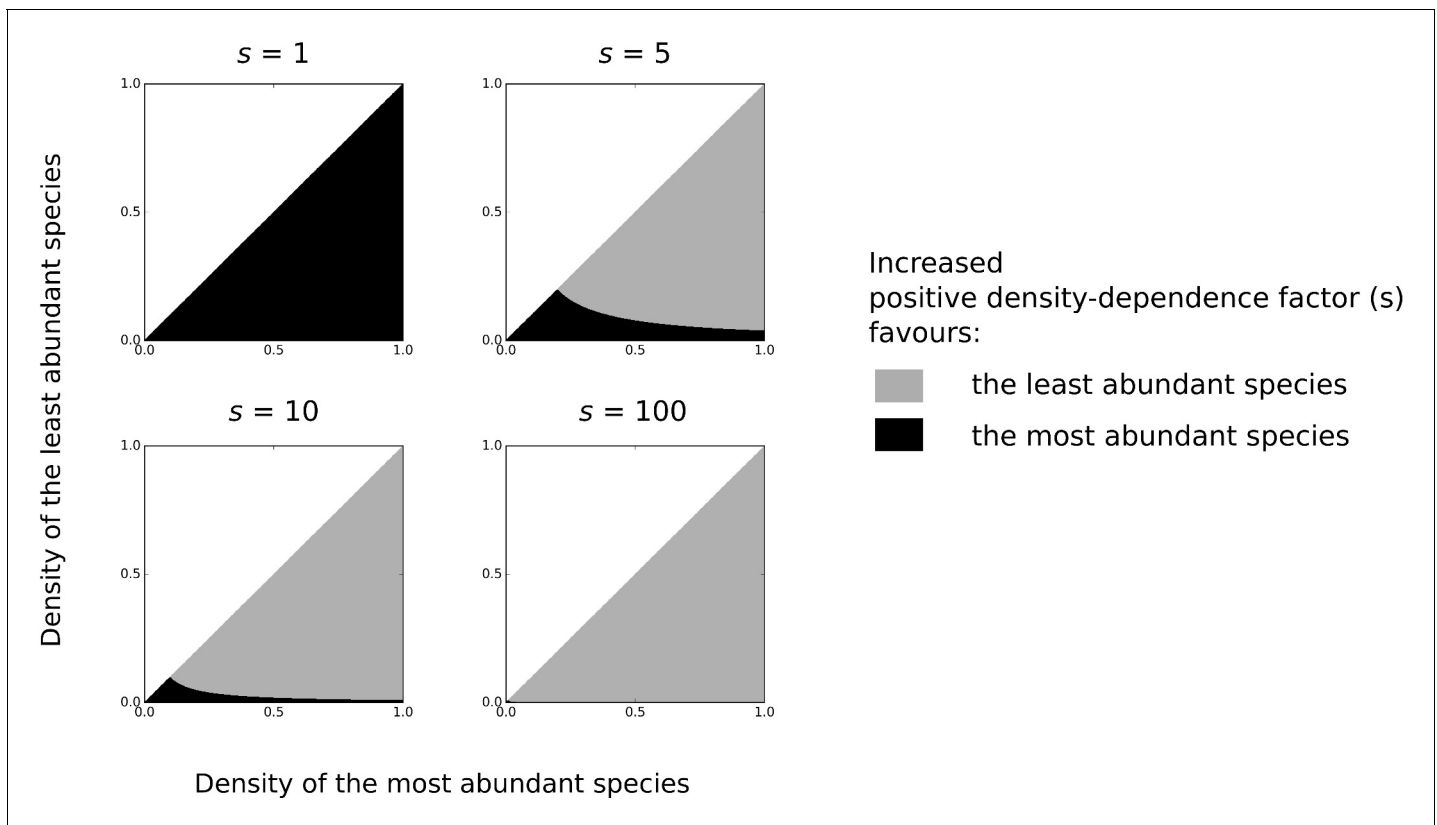

**Figure 3—figure supplement 3.** Effect of increased density-dependence factor on the mortality of the least vs. the most abundant species. Effect of increased density-dependence factor on the mortality of the least vs. the most abundant species, determined from the values of  $\frac{\partial D}{\partial s}$  for different values of  $n_i$  (see **Figure 3**). For a high density-dependence factor (high  $s$ ), the mortality rate of the least abundance species decreases the most with increased density-dependence factor (lower  $\frac{\partial D}{\partial s}$ ).

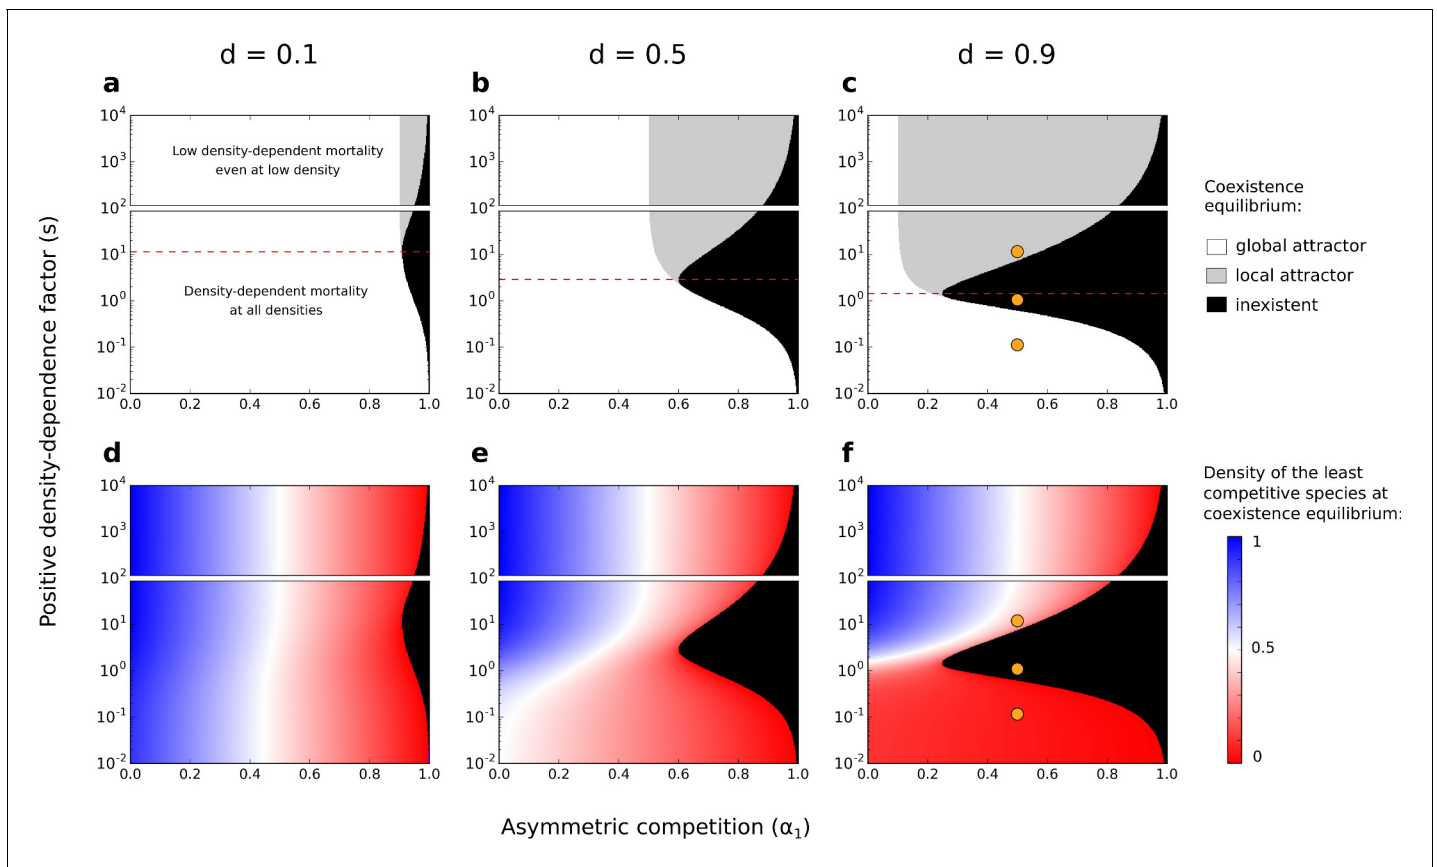

**Figure 4.** Effects of asymmetric competition for resources ( $\alpha_1$ ) and positive density-dependence factor ( $s$ ) on coexistence. Different values of the basal mortality rate ( $d$ ) are also tested. If the coexistence equilibrium exists, it is either a global attractor (it is reached independently of the initial conditions, as long as the two species start at density  $>0$ ) or a local attractor (it is not reached if the least competitive species is initially at a low density) (a–c). In each subfigure, the range of  $s$  is arbitrarily divided in two; one range where there is conspecific positive density dependence at all densities, and another range where positive density-dependent mortality is very low even at very low densities (one might not consider those cases as conspecific positive density dependence). The dashed red lines correspond to the  $s$  values above which increased density-dependence factor ( $s$ ) can favor coexistence (see **Supplementary file 1B**). Note the use of a logarithmic y-scale; the dashed red lines are not planes of symmetry. Orange dots corresponds to the combinations of parameters tested in **Figure 5**. Densities of the least competitive species at coexistence equilibrium are also represented (d–f). The growth rate of the most competitive species is not affected by the other species. Therefore, at the coexistence equilibrium, the density of the most competitive species correspond to the density of the least competitive species if  $\alpha_1 = 0$ .

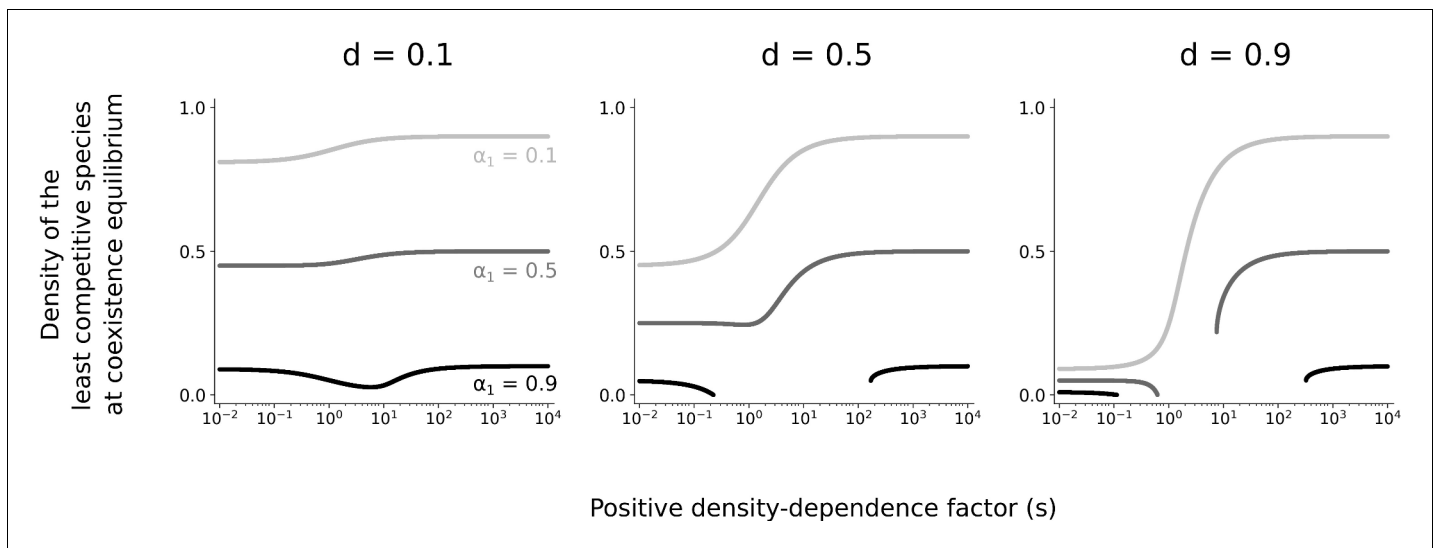

**Figure 4—figure supplement 1.** Densities at coexistence equilibrium. Effects of asymmetric competition for resources ( $\alpha_1$ ) and conspecific positive density dependence (depending on  $s$ ) on densities at coexistence equilibrium, using analytical derivations. Different values of the basal mortality rate ( $d$ ) are also tested. If the coexistence equilibrium does not exist, the least competitive species always gets extinct (density = 0, not shown here).

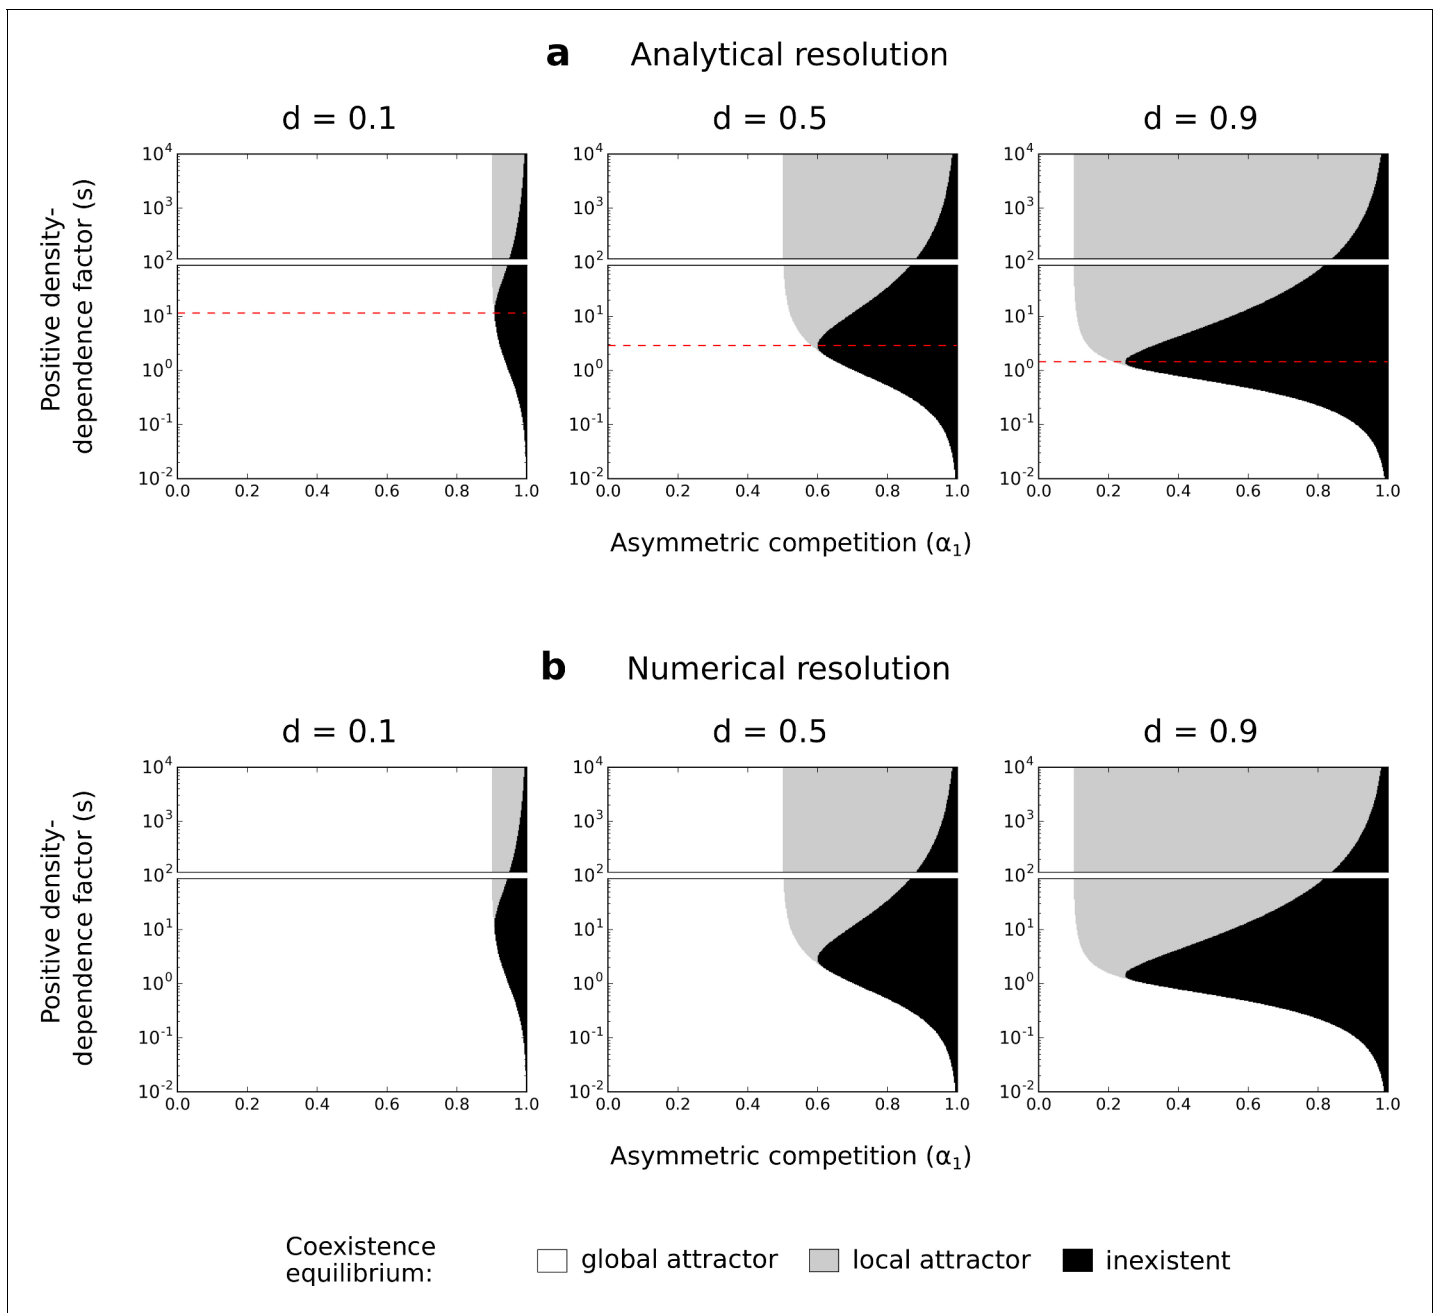

**Figure 4—figure supplement 2.** Identification of the coexistence equilibrium using analytical derivations or using the numerical resolution method. Identification of the coexistence equilibrium in the model with asymmetric competition for resources, using analytical derivations (a) or using the numerical resolution method presented in **Supplementary file 1C** (b) (on system of **Equations 1a and 1b**). See **Figure 4a-c** and **Figure 6** for more details.



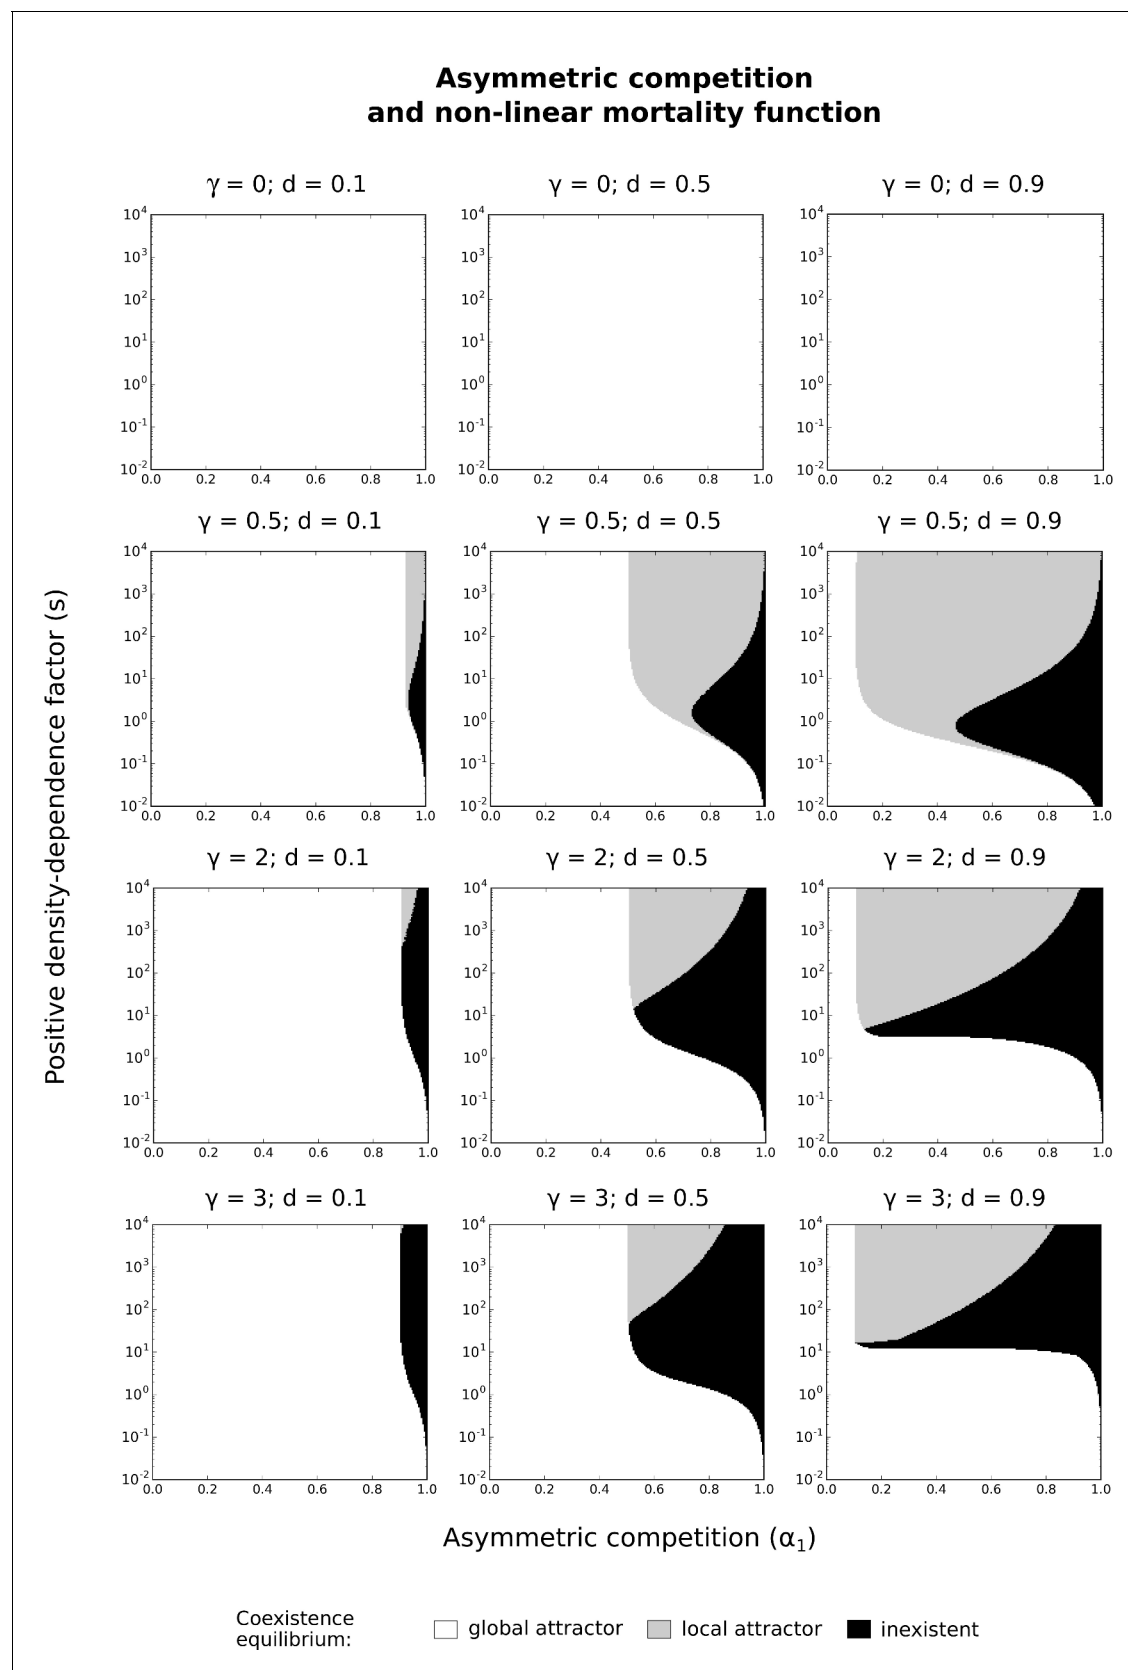

**Figure 4—figure supplement 3.** With other non-linear mortality functions. Implications of other non-linear mortality functions for the effects of asymmetric competition for resources ( $\alpha_1$ ) and positive density-dependence factor ( $s$ ) on coexistence. Different values of the basal mortality rate ( $d$ ) are Figure 4—figure supplement 3 continued on next page

Figure 4—figure supplement 3 continued

tested. The numerical resolution method is used on the system of **Equations 1a** with the non-linear mortality functions  $D(n_i)$  described in **Figure 3—figure supplement 1** (panels a-e; with different values of exponent  $\gamma$  making the curve sigmoidal). See **Figure 4** for more details.

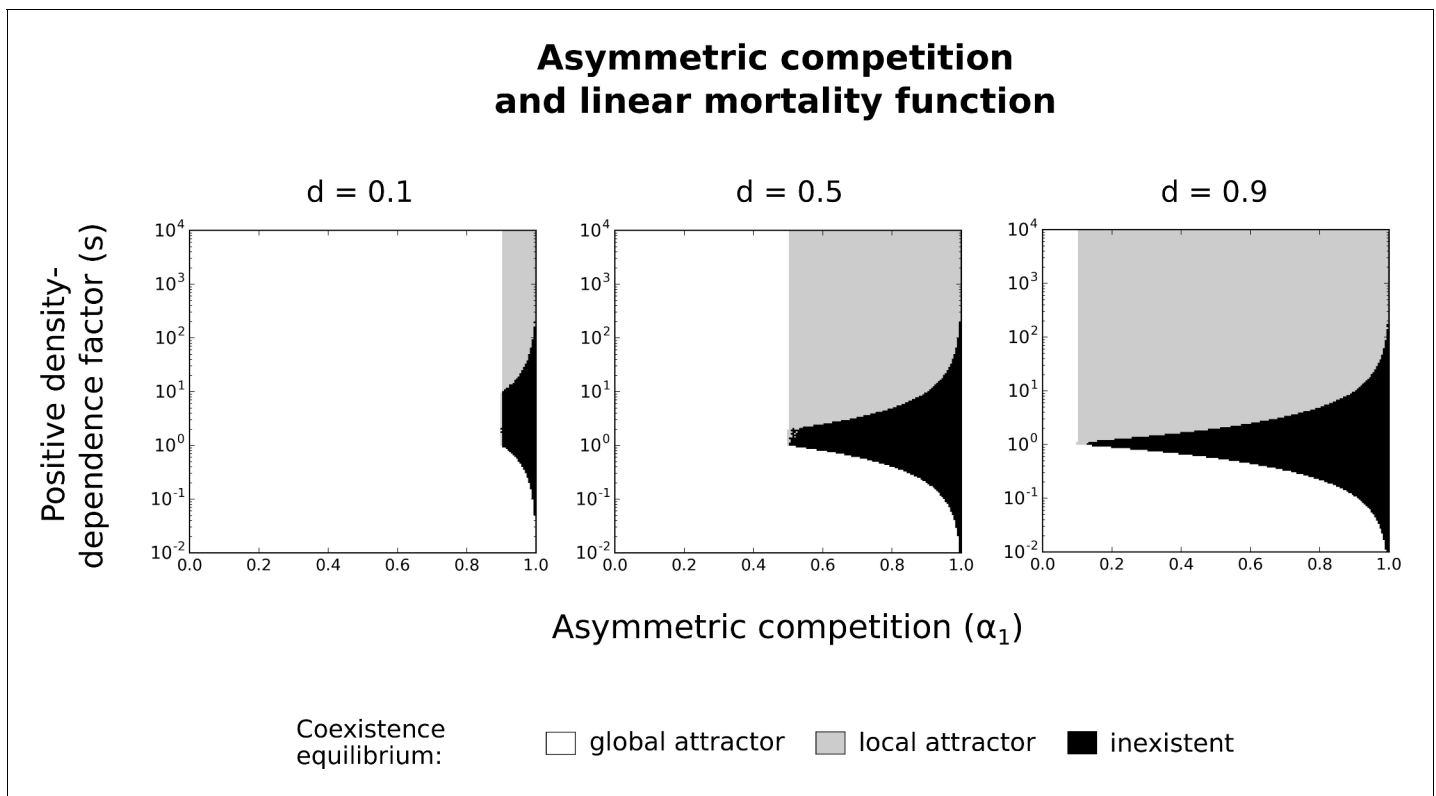

**Figure 4—figure supplement 4.** With a linear mortality function. Implications of a linear mortality function for the effects of asymmetric competition for resources ( $\alpha_1$ ) and positive density-dependence factor ( $s$ ) on coexistence. Different values of the basal mortality rate ( $d$ ) are tested. The numerical resolution method is used on the system of **Equations 1a** with the linear mortality functions  $D(n_i)$  described in **Figure 3—figure supplement 1** (panel f). See **Figure 4** for more details.

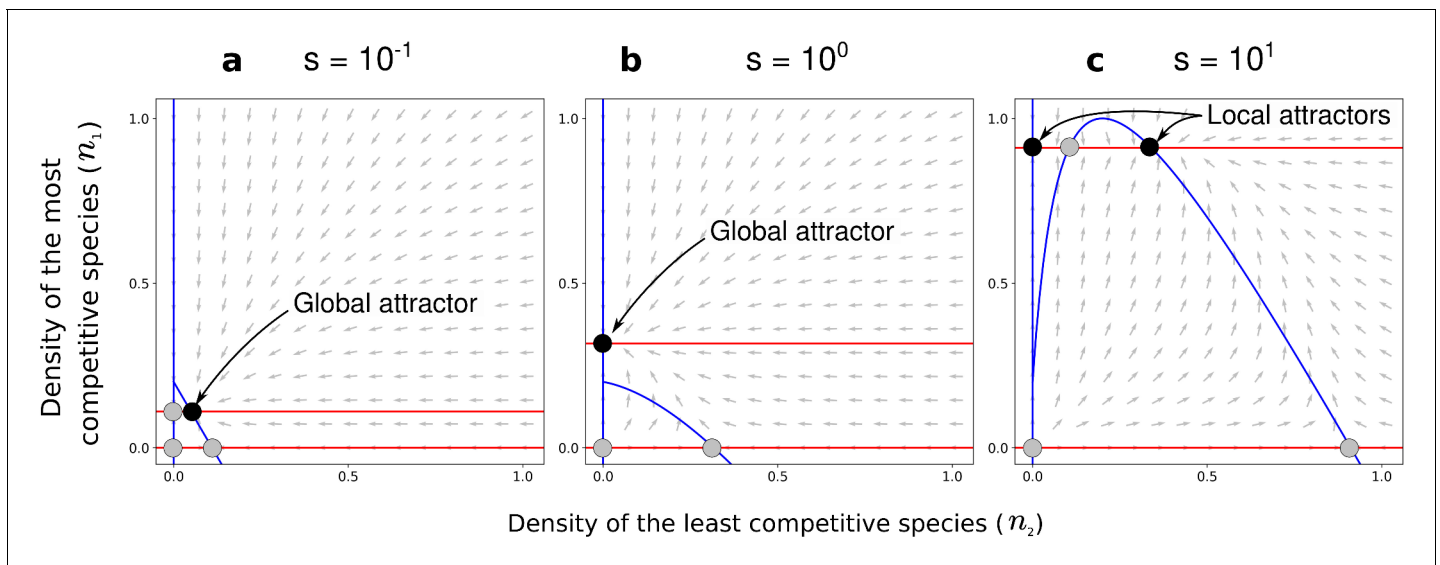

**Figure 5.** Effect of the positive density-dependence factor ( $s$ ) on the zero-net-growth isoclines in the case of asymmetric competition for resources. Gray arrows represent the directions of the deterministic changes of species densities. Red and blue lines correspond to the isoclines (when  $dn_i/dt = 0$ ) for species 1 and 2, respectively. Black and gray points represent stable and unstable equilibria, respectively. In each panel, the nature of the stable equilibria is annotated. Panel (a) corresponds to a case with a coexistence equilibrium that is a global attractor, panel (b) to a case without coexistence equilibrium, and panel (c) to a case with a coexistence equilibrium that is a local attractor. Other parameters:  $d = 0.9$  and  $\alpha_1 = 0.5$ , corresponding to the combinations of parameters represented by orange dots in **Figure 4c** and **Figure 4f**.

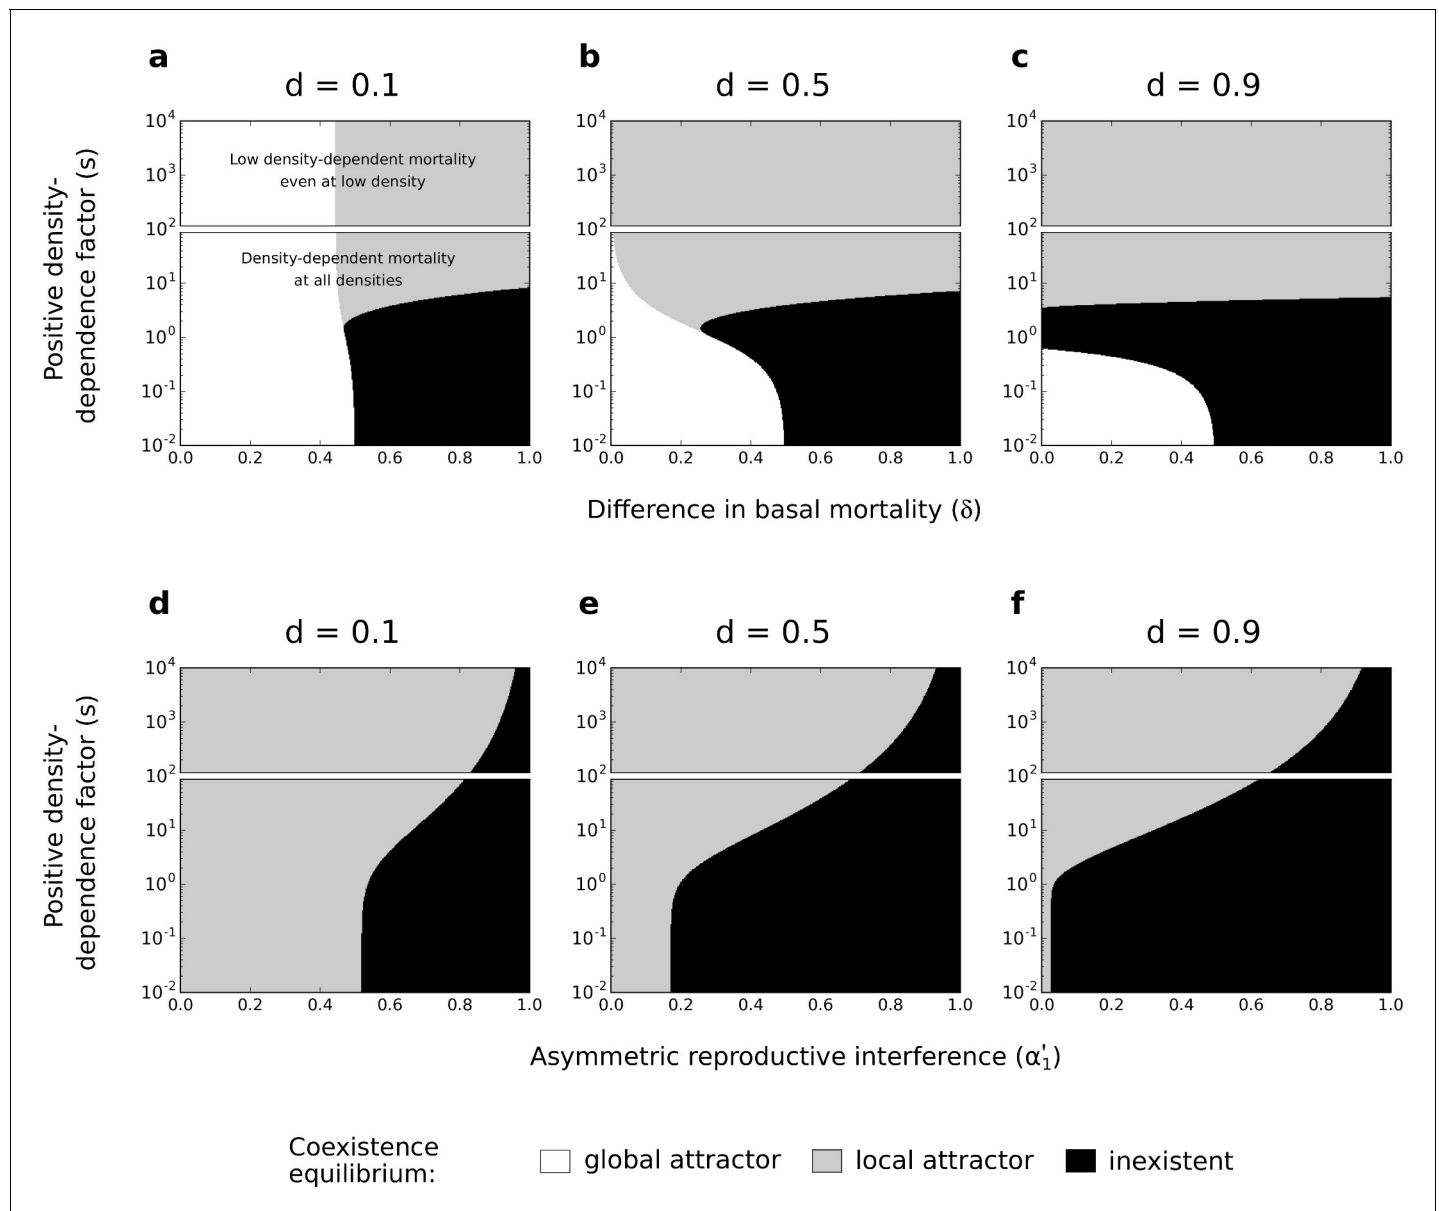

**Figure 6.** Effects of difference in basal mortality between species ( $\delta$ ) (a,b,c) or asymmetric reproductive interference ( $\alpha'_1$ ) (d,e,f), and positive density-dependence factor ( $s$ ) on coexistence, using the numerical resolution method (systems of **Equations 2 and 3**, respectively). If the coexistence equilibrium exists, it is either a global attractor or a local attractor. In each subfigure, the range of  $s$  is arbitrarily divided in two; one range where there is conspecific positive density dependence at all densities, and another range where positive density-dependent mortality is very low even at very low densities. Because those two forms of species asymmetry do not promote species exclusion to the same extent, the levels of symmetric competition for resources are chosen as:  $\alpha = 0.5$  (a,b,c) or  $\alpha = 0$  (d,e,f).

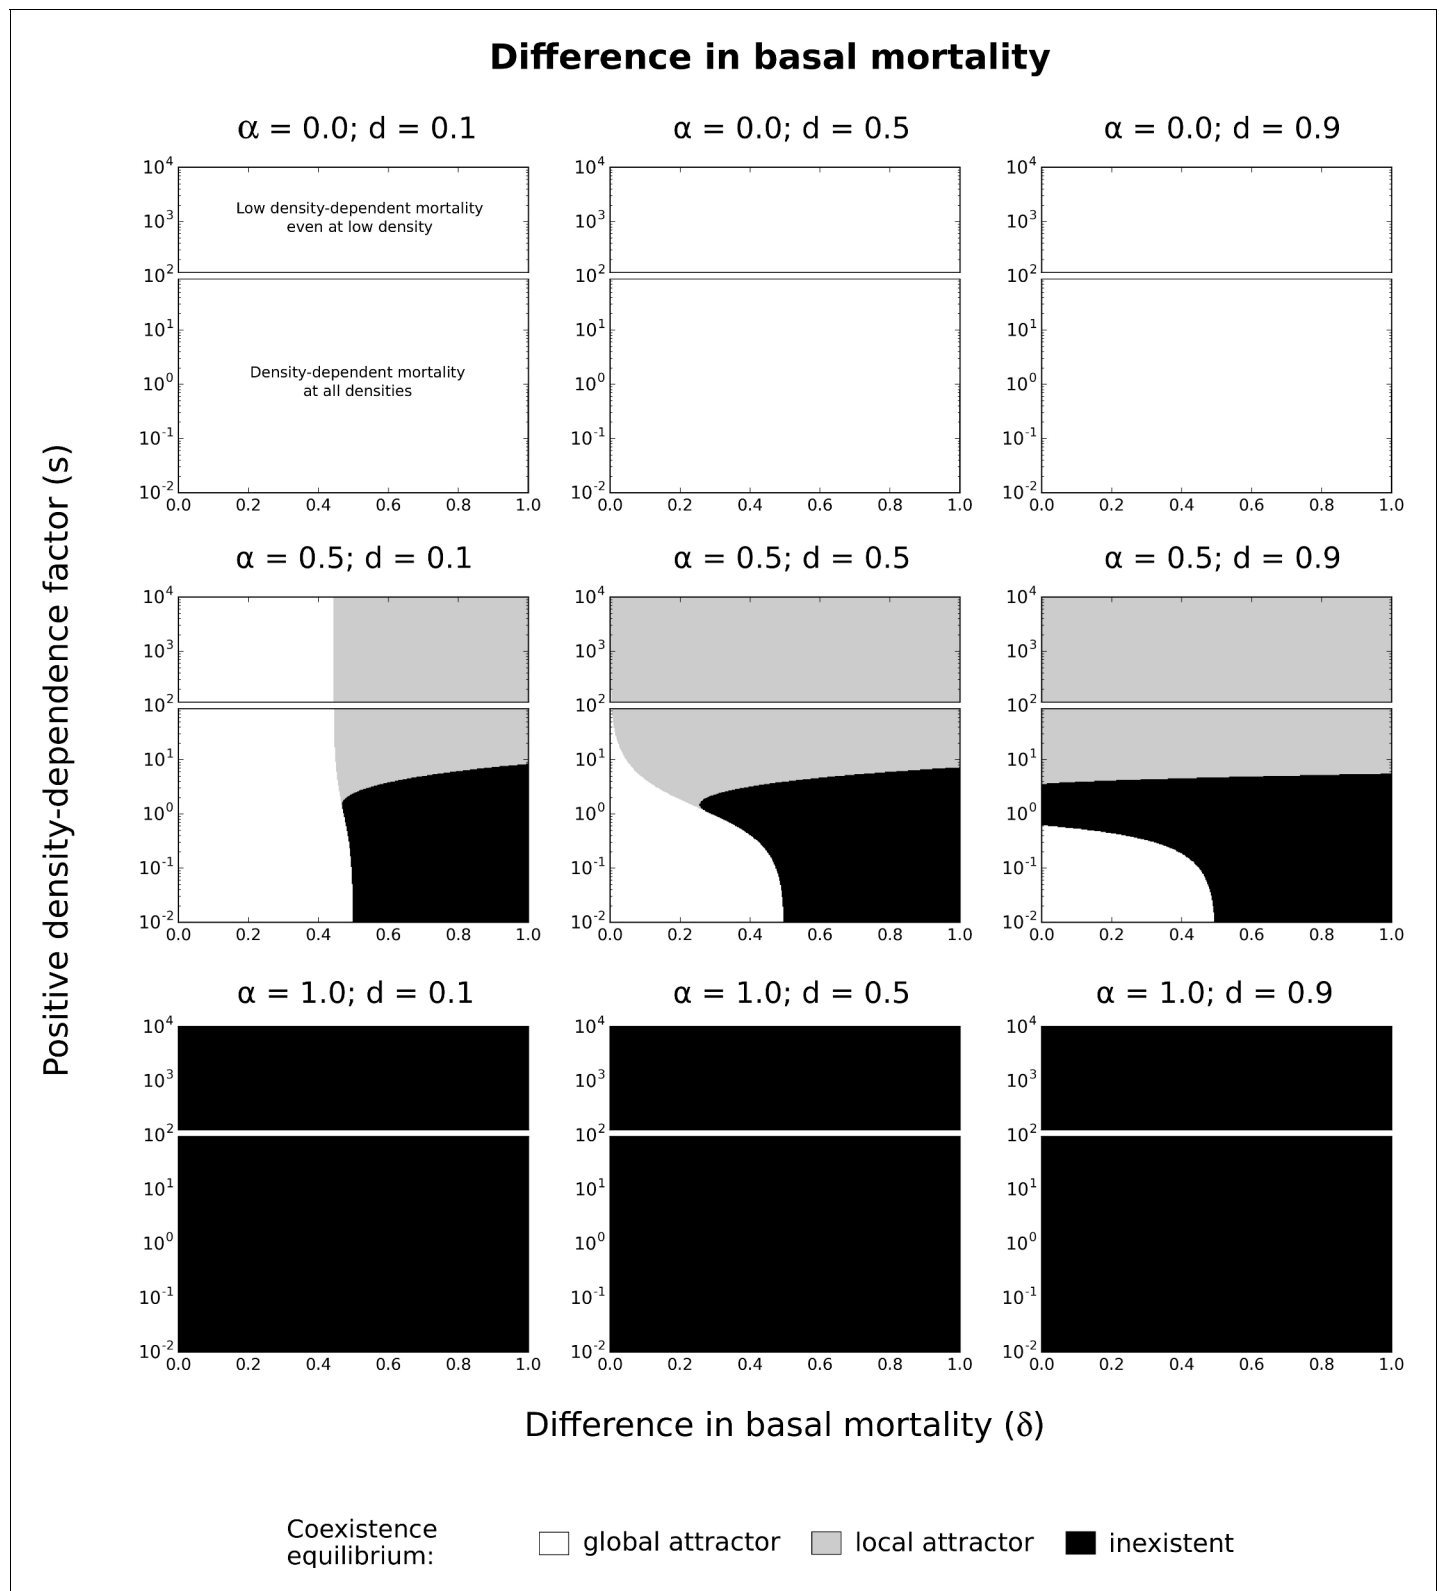

**Figure 6—figure supplement 1.** Difference in basal mortality with other levels of symmetric competition for resources. Effects of difference in basal mortality between species ( $\delta$ ) and positive density-dependence factor ( $s$ ) on coexistence, using the numerical resolution method (system of **Equation 2**). Different levels of symmetric competition for resources ( $\alpha$ ) and basal mortality rates ( $d$ ) are tested. See **Figure 6** for more details.



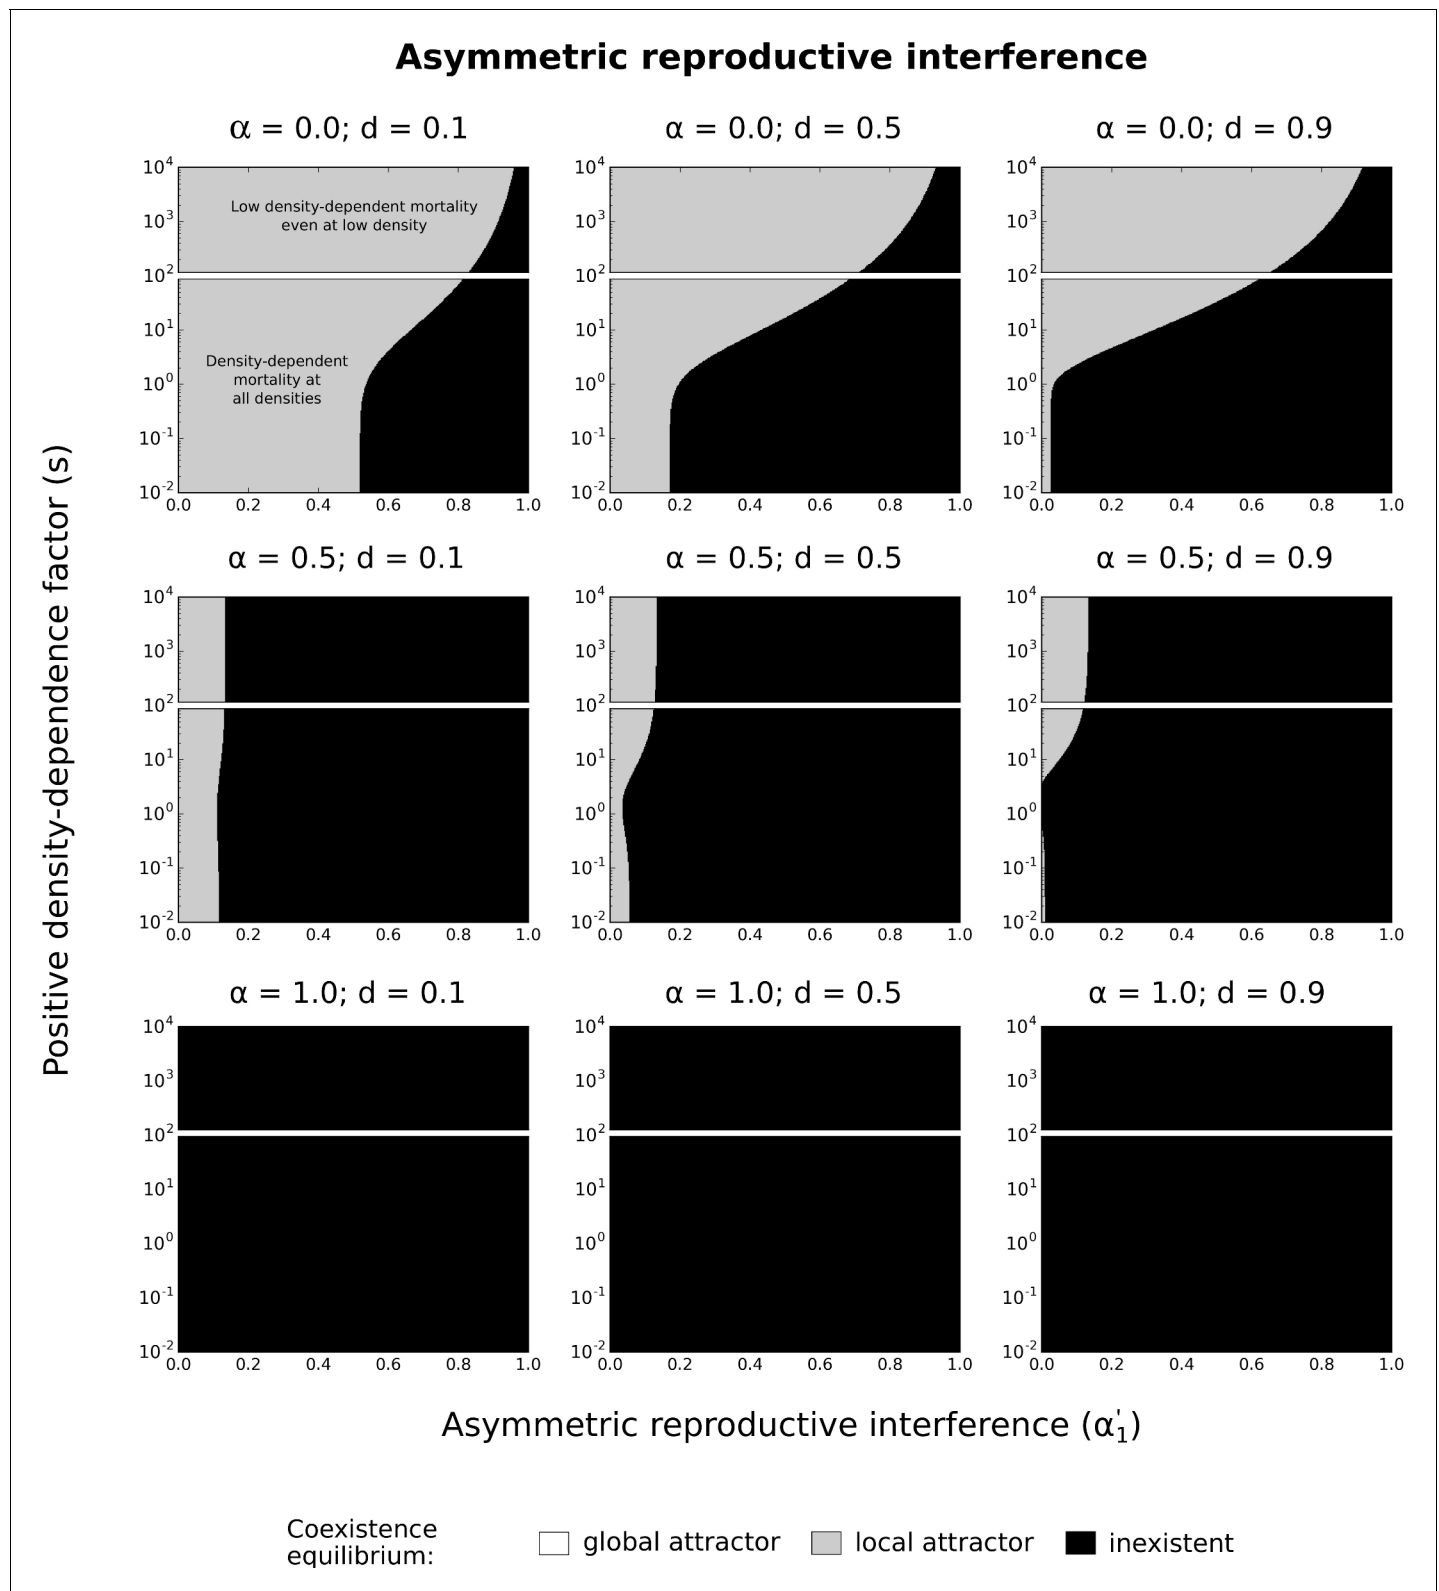

**Figure 6—figure supplement 2.** Asymmetric reproductive interference with other levels of symmetric competition for resources. Effects of asymmetric reproductive interference ( $\alpha_1'$ ) and positive density-dependence factor ( $s$ ) on coexistence, using the numerical resolution method (system of Equation 3). Different levels of symmetric competition for resources ( $\alpha$ ) and basal mortality rates ( $d$ ) are tested. See Figure 6 for more details.

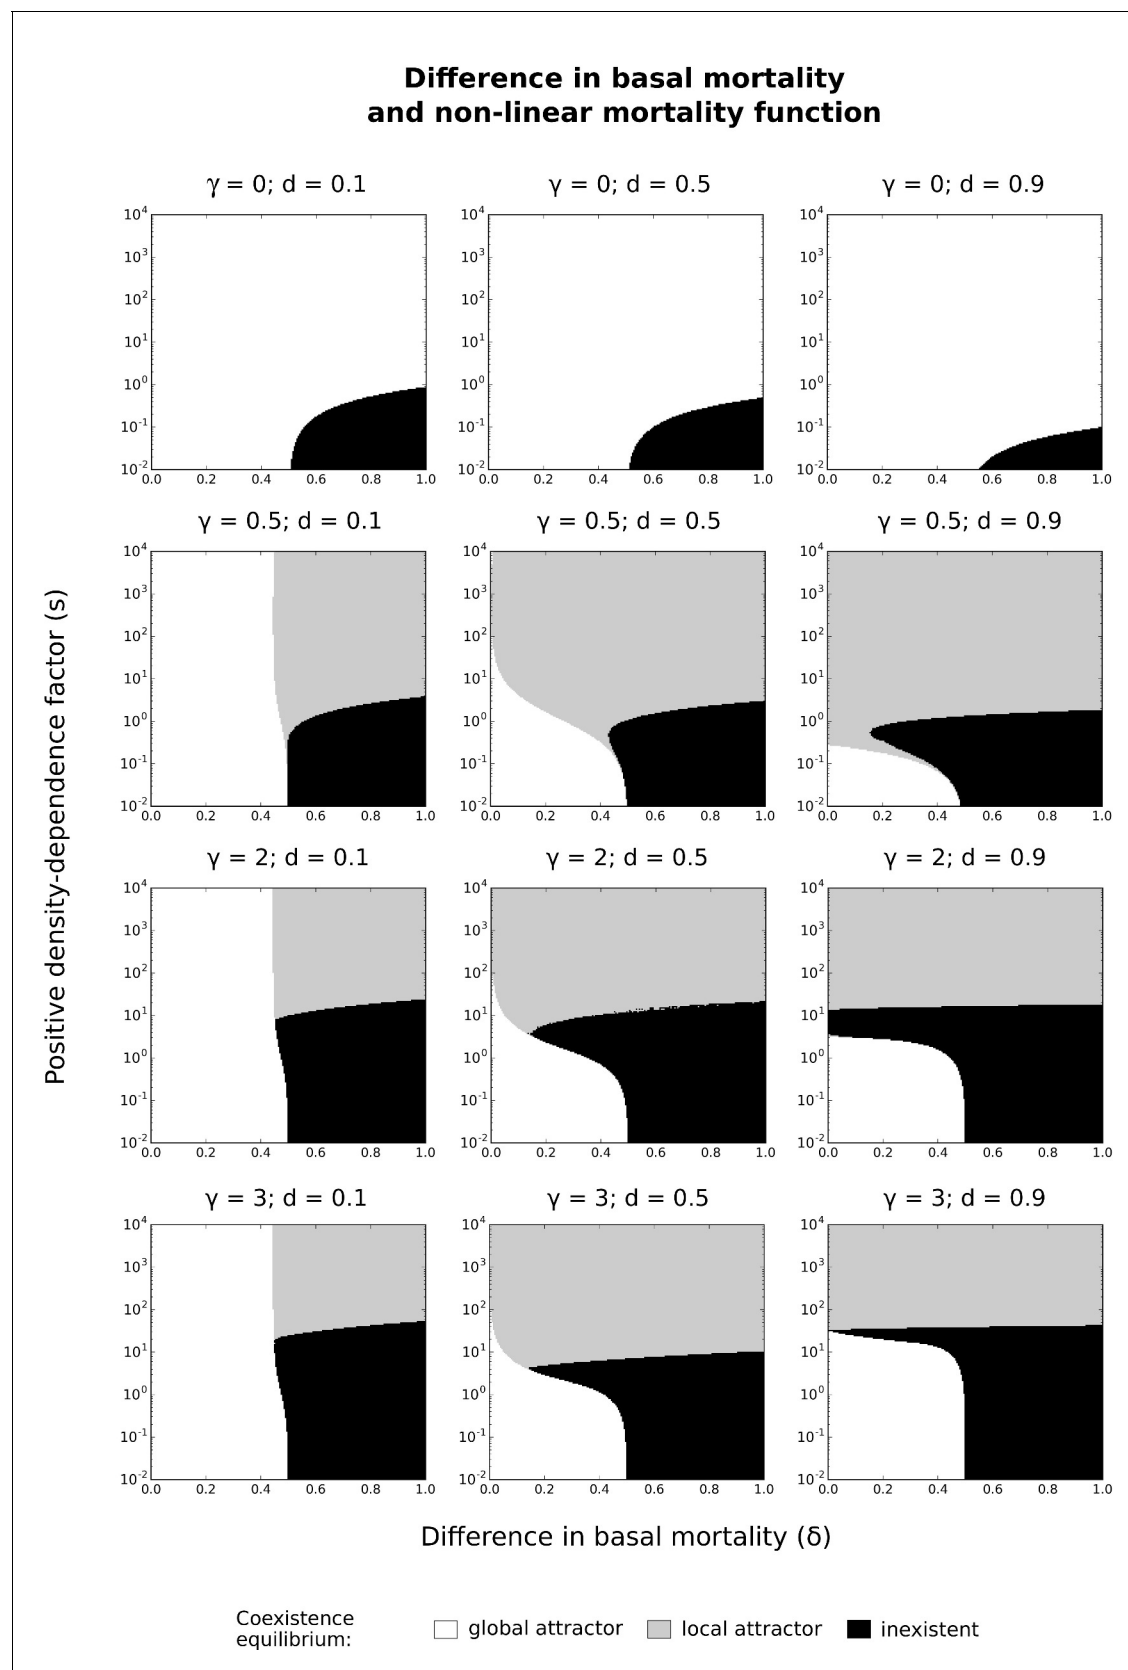

**Figure 6—figure supplement 3.** Difference in basal mortality with other non-linear mortality functions. Implications of other non-linear mortality functions for the effects of difference in basal mortality between species ( $\delta$ ) and positive density-dependence factor ( $s$ ) on coexistence. Different values

Figure 6—figure supplement 3 continued on next page

Figure 6—figure supplement 3 continued

of the basal mortality rate ( $d$ ) are tested. The numerical resolution method is used on the system of **Equation 2** with the non-linear mortality functions  $D(n_i)$  described in **Figure 3—figure supplement 1** (panels a-e; with different values of exponent  $\gamma$  making the curve sigmoidal). Levels of symmetric competition for resources:  $\alpha = 0.05$ . See **Figure 6** for more details.

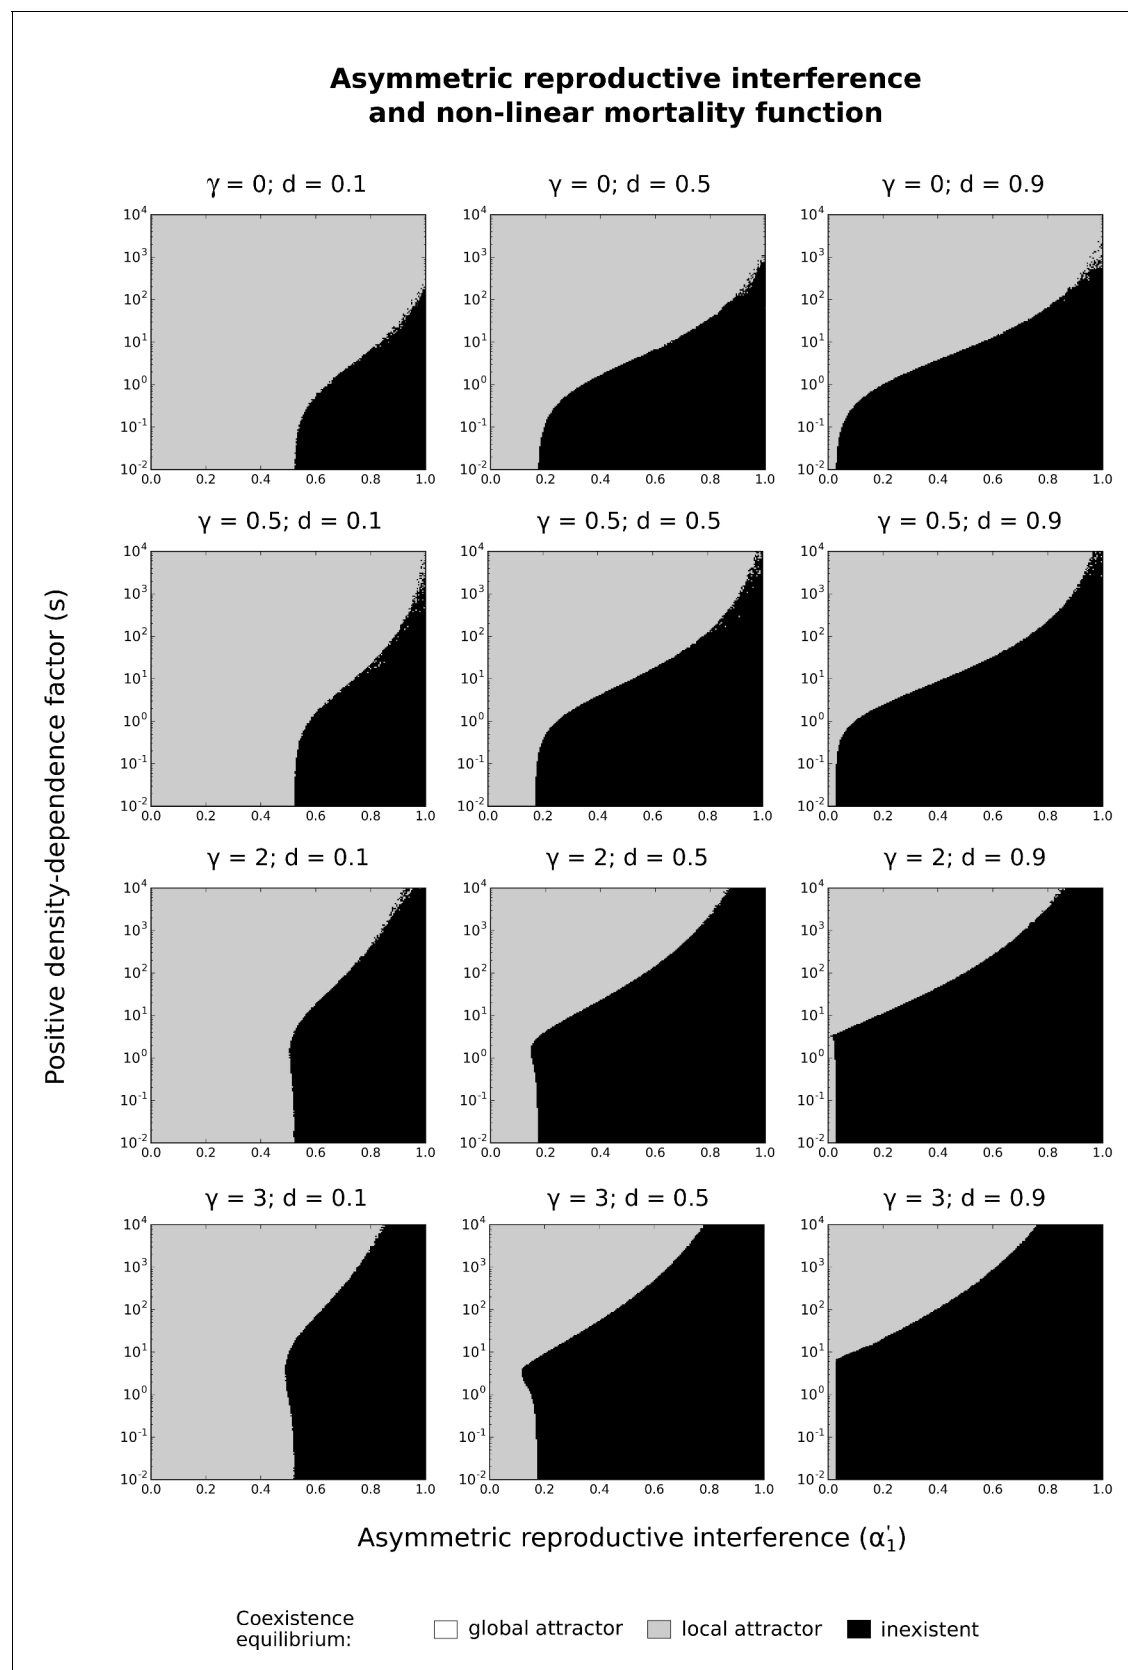

**Figure 6—figure supplement 4.** Asymmetric reproductive interference with other non-linear mortality functions. Implications of other non-linear mortality functions for the effects of asymmetric reproductive interference ( $\alpha'_1$ ) and positive density-dependence factor ( $s$ ) on coexistence. Different Figure 6—figure supplement 4 continued on next page

Figure 6—figure supplement 4 continued

values of the basal mortality rate ( $d$ ) are tested. The numerical resolution method is used on the system of **Equation 3** with the non-linear mortality functions  $D(n_i)$  described in **Figure 3—figure supplement 1** (panels a-e; with different values of exponent  $\gamma$  making the curve sigmoidal). Levels of symmetric competition for resources:  $\alpha = 0$ . See **Figure 6** for more details.

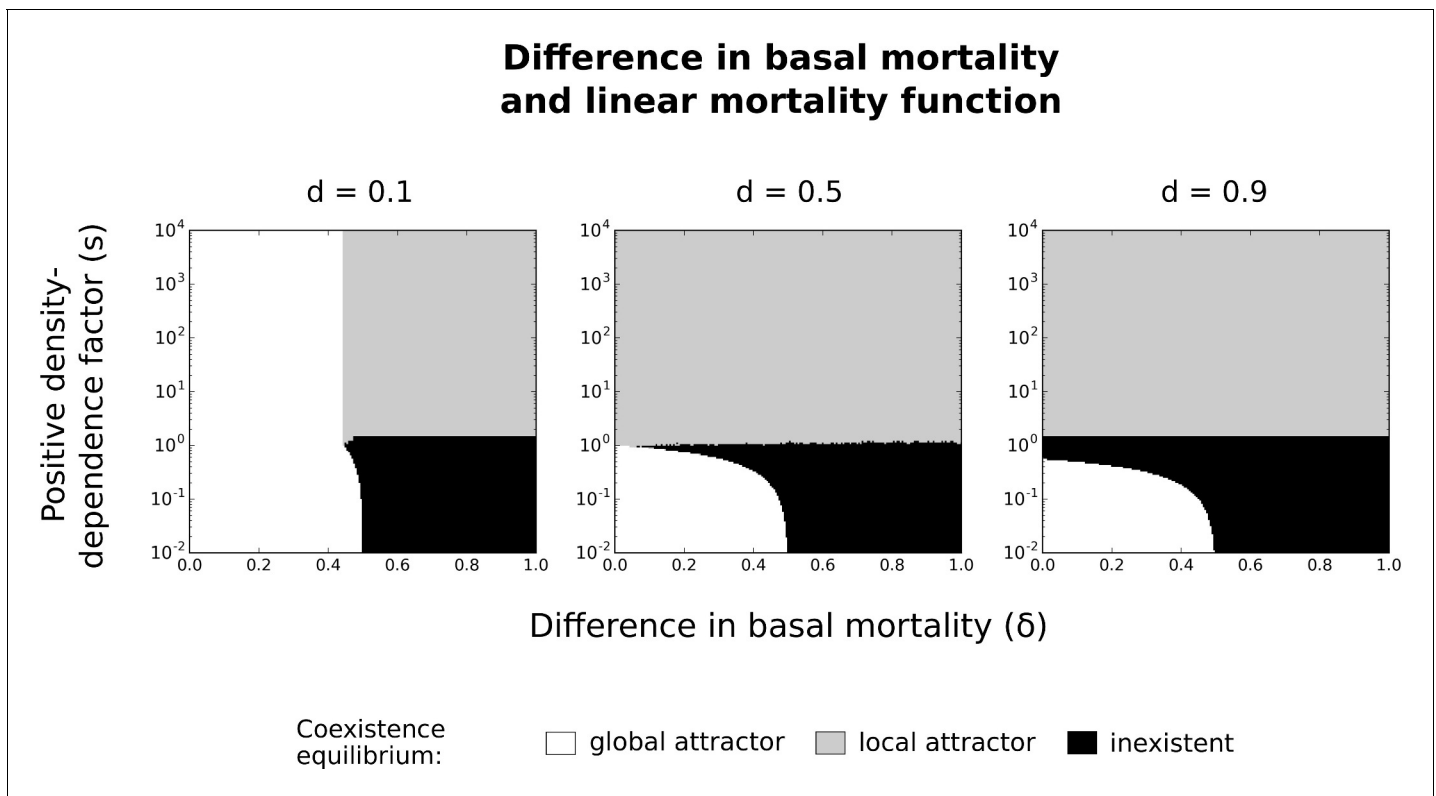

**Figure 6—figure supplement 5.** Difference in basal mortality with a linear mortality function. Implications of a linear mortality function for the effects of difference in basal mortality between species ( $\delta$ ) and positive density-dependence factor ( $s$ ) on coexistence. Different values of the basal mortality rate ( $d$ ) are tested. The numerical resolution method is used on the system of **Equation 2** with the linear mortality functions  $D(n_i)$  described in **Figure 3—figure supplement 1** (panel f). Levels of symmetric competition for resources:  $\alpha = 0.05$ . See **Figure 6** for more details.



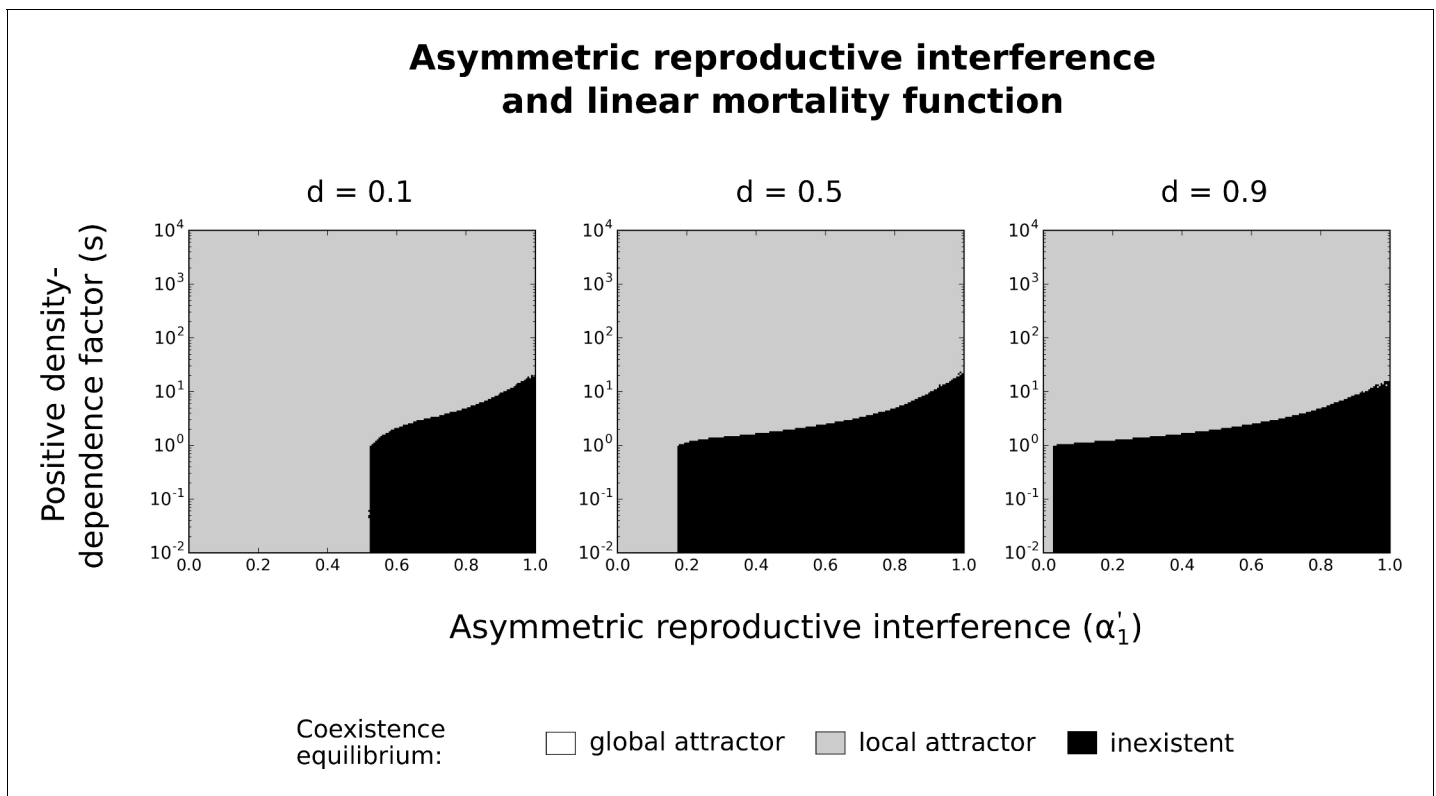

**Figure 6—figure supplement 6.** Asymmetric reproductive interference with a linear mortality function. Implications of a linear mortality function for the effects of asymmetric reproductive interference ( $\alpha'_1$ ) and positive density-dependence factor ( $s$ ) on coexistence. Different values of the basal mortality rate ( $d$ ) are tested. The numerical resolution method is used on the system of **Equation 3** with the linear mortality functions  $D(n_i)$  described in **Figure 3—figure supplement 1** (panel f). Levels of symmetric competition for resources:  $\alpha = 0$ . See **Figure 6** for more details.

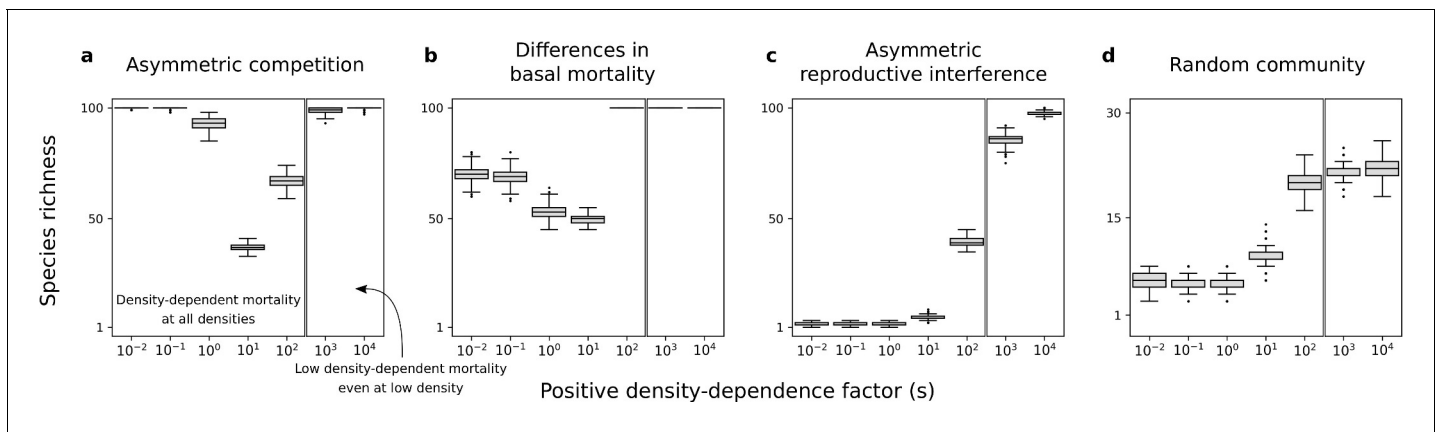

**Figure 7.** Species richness maintained in simulated communities. Each box represents the distribution for 500 simulated communities with 100 species initially. (a) Only asymmetric competition for resources. (b) Only differences in basal mortality. (c) Only asymmetric reproductive interference. (d) Random communities with all forms of species asymmetry. In each subfigure, the range of  $s$  is arbitrarily divided in two; one range where there is conspecific positive density dependence at all densities, and another range where positive density-dependent mortality is very low even at very low densities. Minimum basal mortality rate:  $d = 0.5$ ; Levels of symmetric competition for resources:  $\alpha = 0.05$  (b) or  $\alpha = 0$  (c), competition for resources is asymmetric otherwise (a, d).

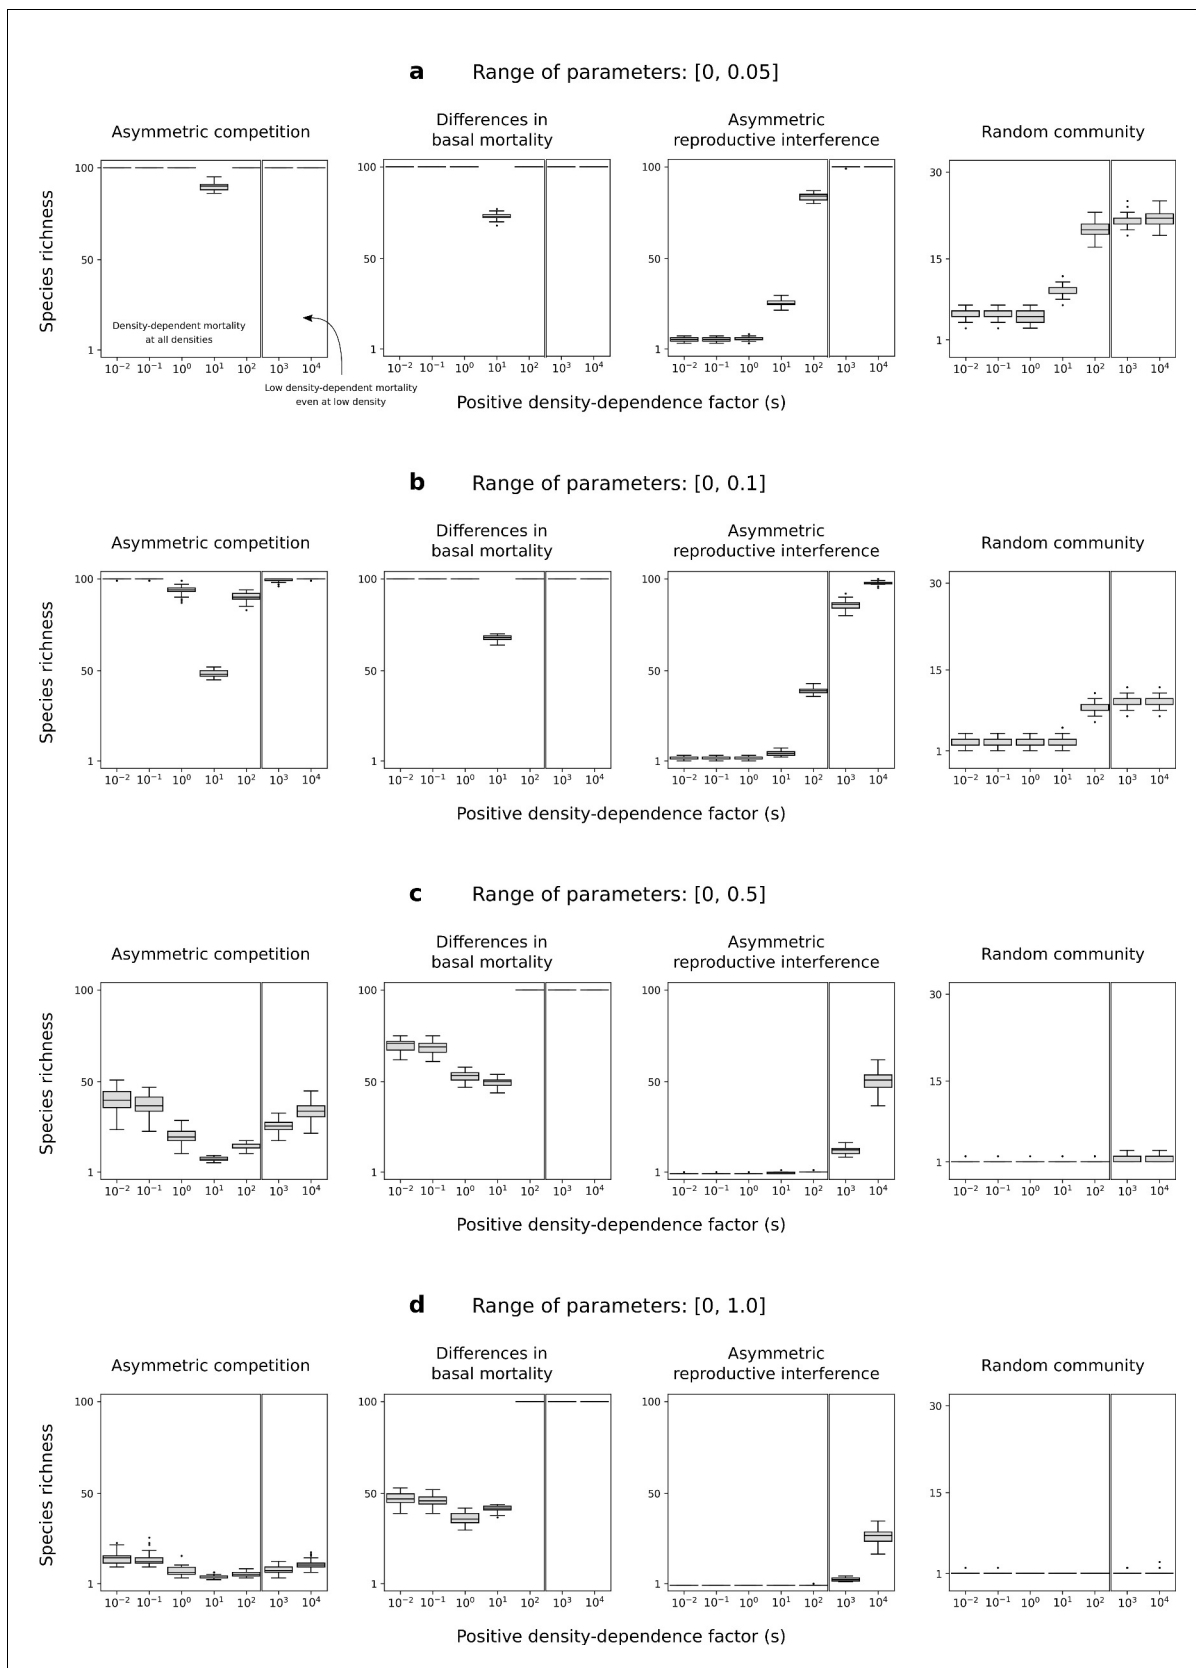

**Figure 7—figure supplement 1.** With parameters drawn from other uniform distributions. Species richness in simulated communities when parameters are drawn from different uniform distributions. See **Figure 7** for more details, and see full methods in **Supplementary file 1D**. Increasing the

*Figure 7—figure supplement 1 continued on next page*

Figure 7—figure supplement 1 continued

asymmetry among species decreases the overall remaining species richness, but does not change qualitatively the results regarding the effect of the positive density-dependence factor  $s$  on species richness.

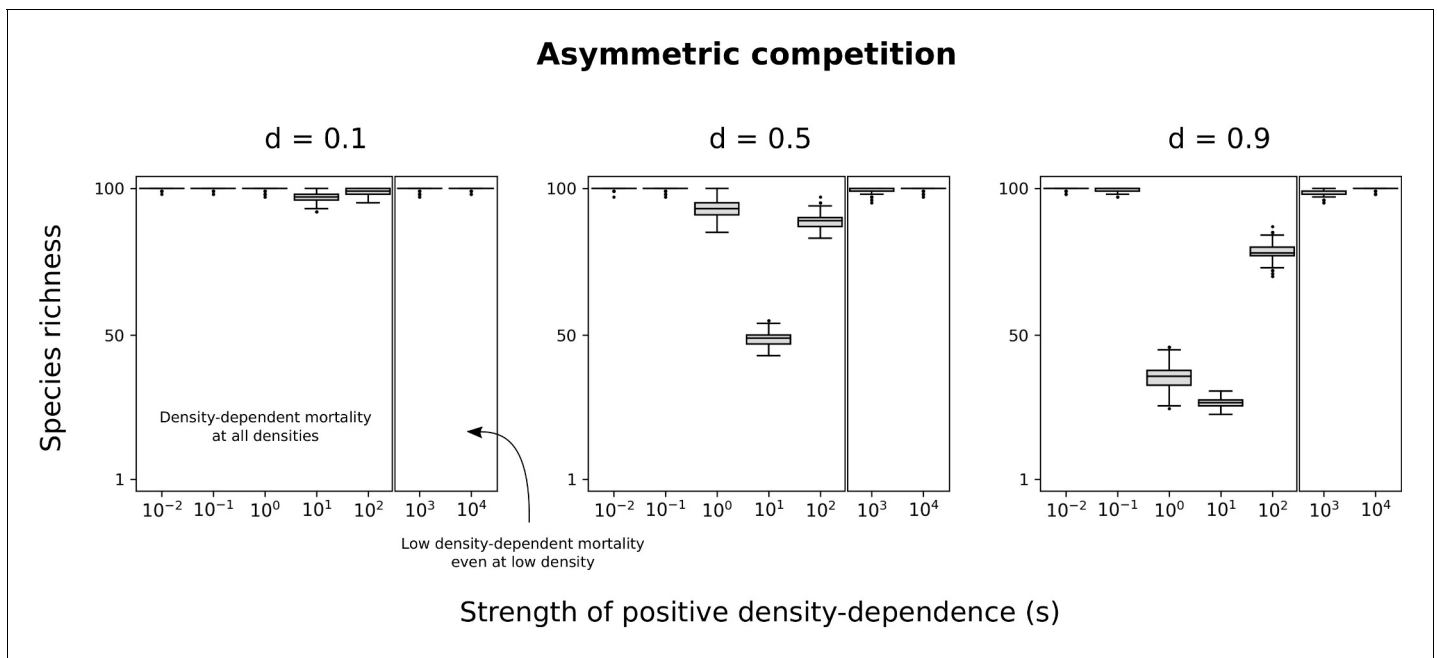

**Figure 7—figure supplement 2.** Asymmetric competition for resources with other minimum basal mortality rates. Species richness maintained in simulated communities with only asymmetric competition for resources. Each box represents the distribution for 500 simulated communities. Different minimum basal mortality rates ( $d$ ) are tested. See **Figure 7** for more details.

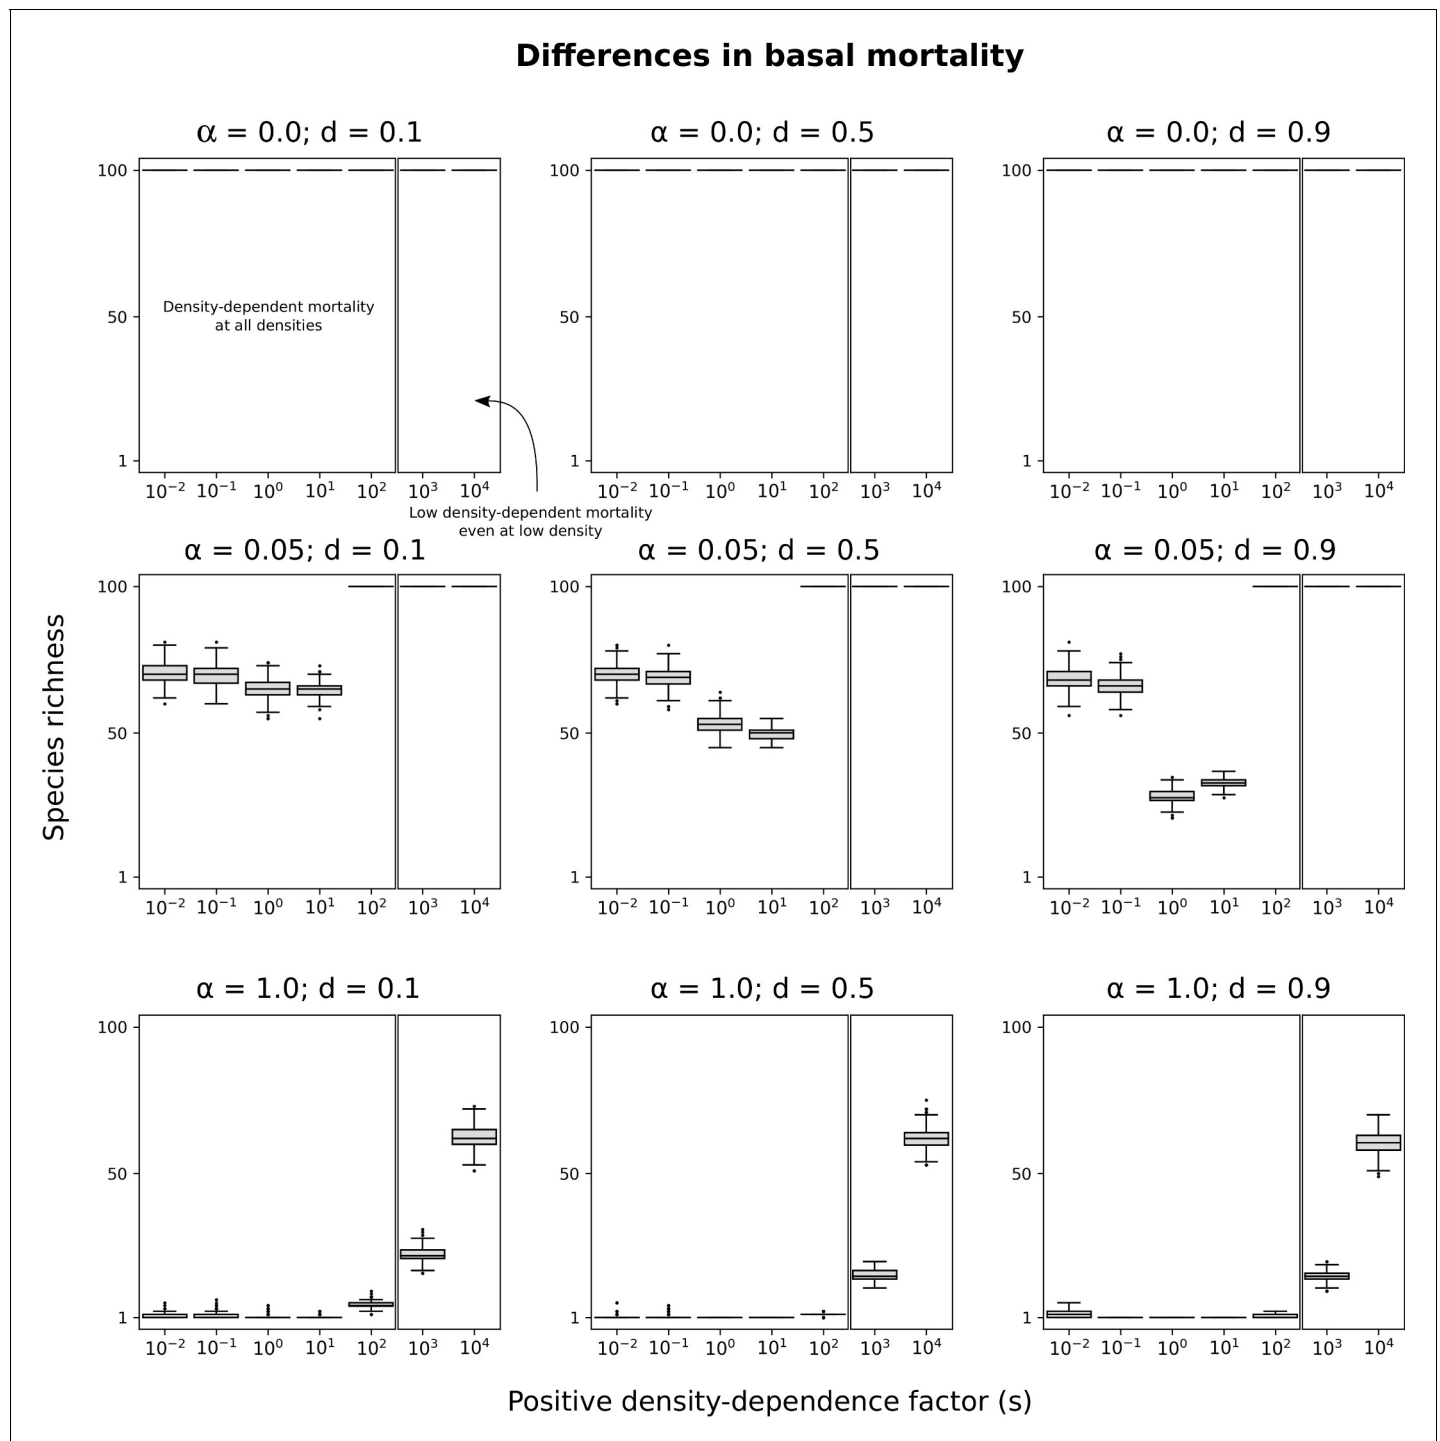

**Figure 7—figure supplement 3.** Differences in basal mortality with other minimum basal mortality rates and other levels of symmetric competition for resources. Species richness maintained in simulated communities with only differences in basal mortality. Each box represents the distribution for 500 simulated communities. Different levels of symmetric competition for resources ( $\alpha$ ) and minimum basal mortality rates ( $d$ ) are tested. See **Figure 7** for more details.



## Asymmetric reproductive interference

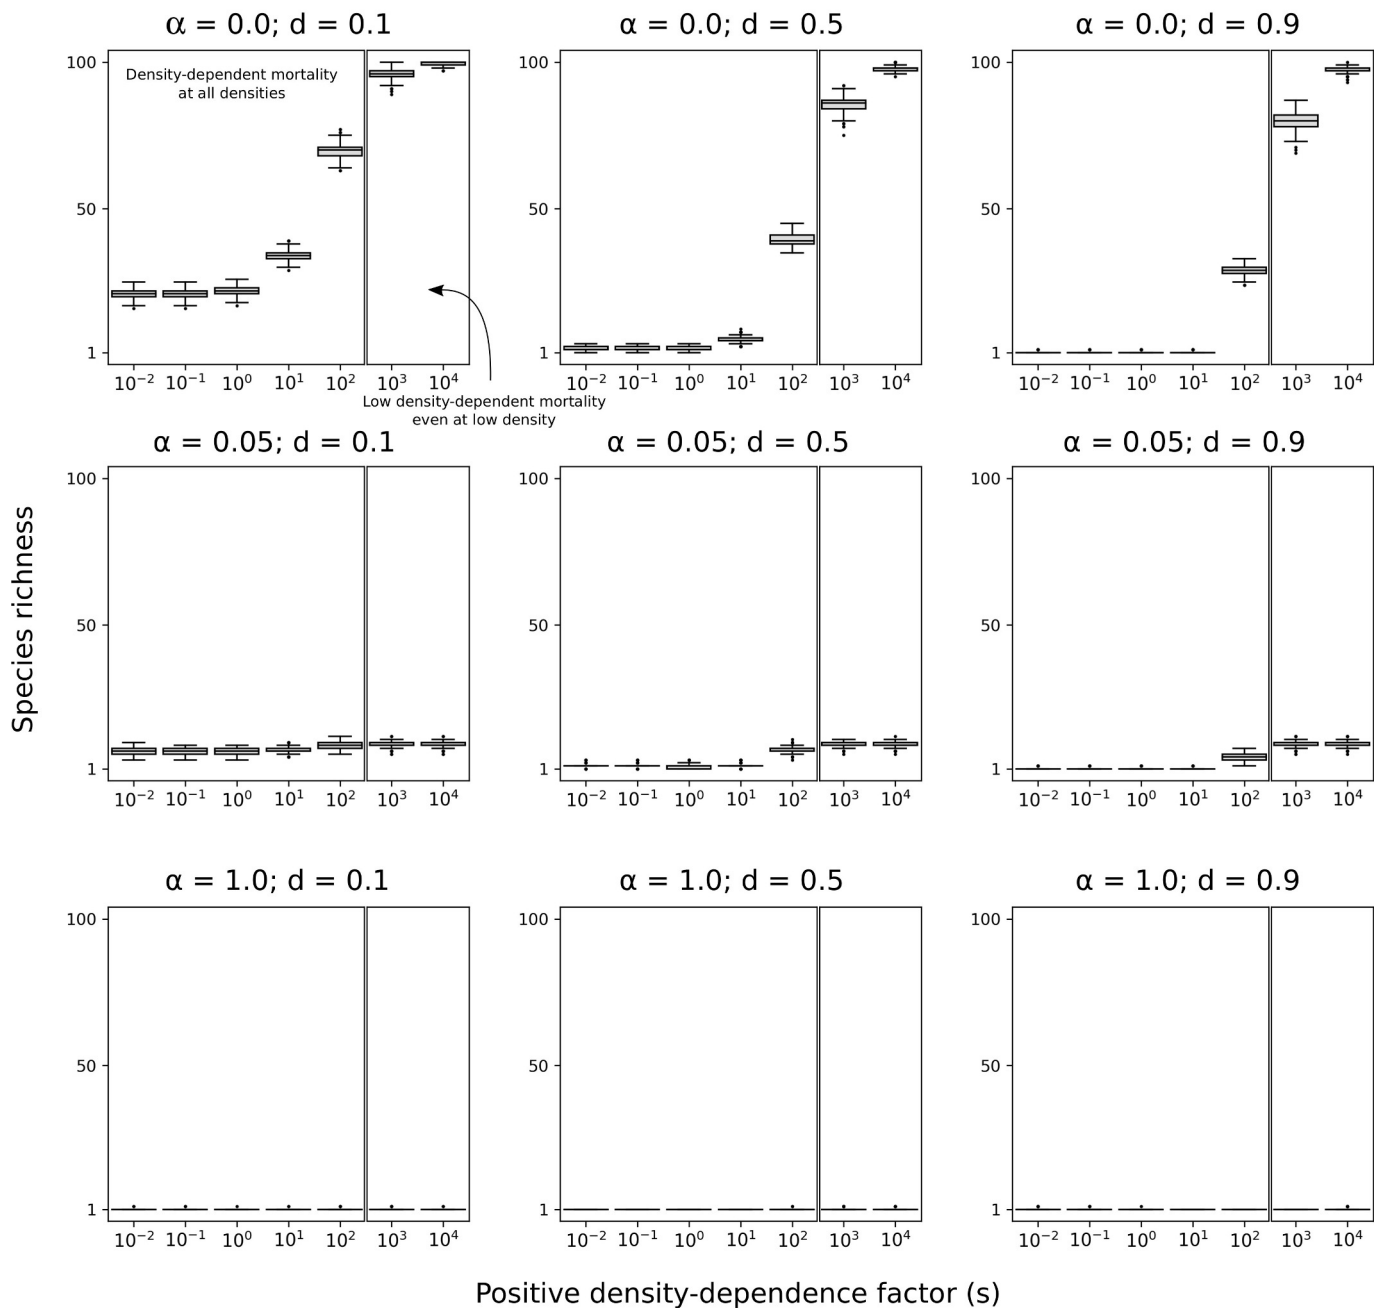

**Figure 7—figure supplement 4.** Asymmetric reproductive interference with other minimum basal mortality rates and other levels of symmetric competition for resources. Species richness maintained in simulated communities with only asymmetric reproductive interference. Each box represents the distribution for 500 simulated communities. Different levels of symmetric competition for resources ( $\alpha$ ) and minimum basal mortality rates ( $d$ ) are tested. See **Figure 7** for more details.

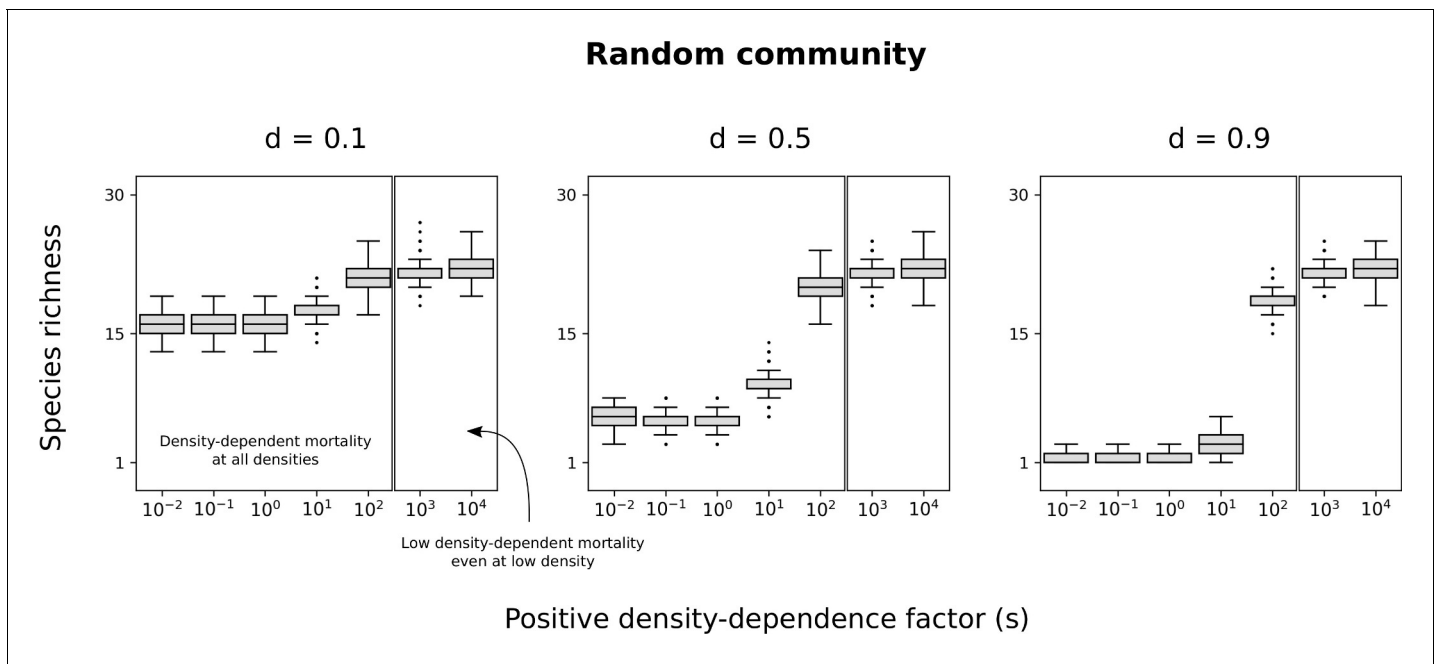

**Figure 7—figure supplement 5.** Random communities with other minimum basal mortality rates. Species richness maintained in simulated communities with all forms of species asymmetry. Each box represents the distribution for 500 simulated communities. Different minimum basal mortality rates ( $d$ ) are tested. See **Figure 7** for more details.

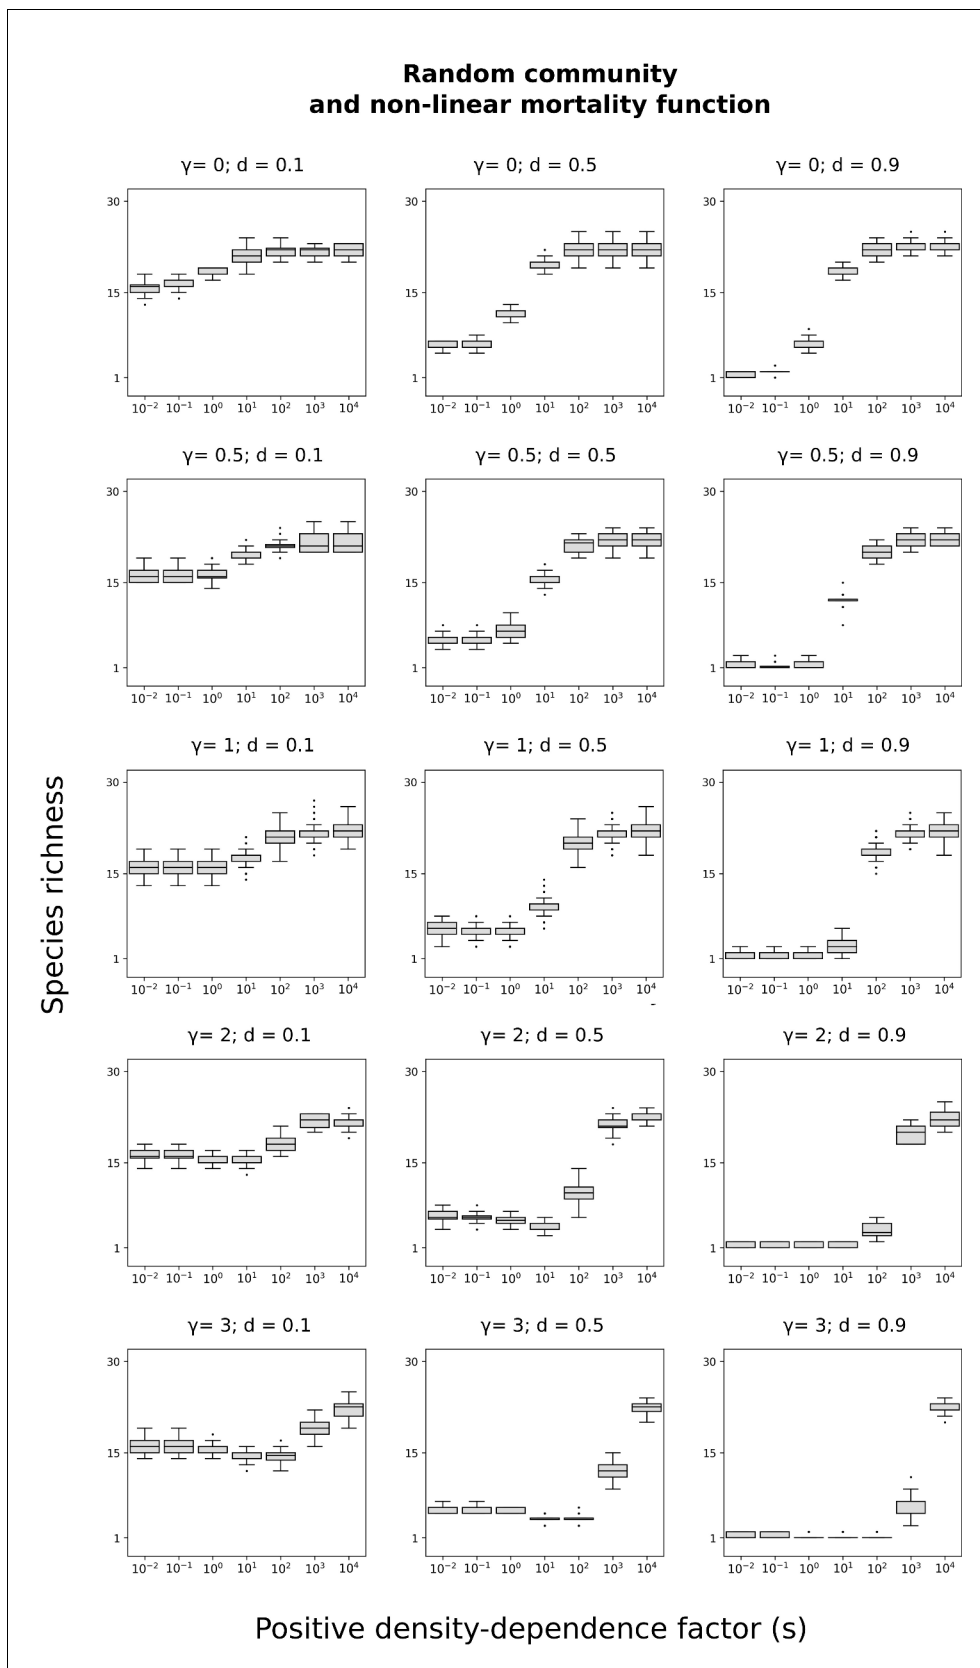

**Figure 7—figure supplement 6.** Random communities with other non-linear mortality functions. Species richness in simulated communities with other non-linear mortality functions. Different minimum basal mortality rates ( $d$ ) are tested, and the non-linear mortality functions  $D(n_i)$  described in Figure 7—figure supplement 6 continued on next page

Figure 7—figure supplement 6 continued

**Figure 3—figure supplement 1** are implemented (panels a-e; with different values of exponent  $\gamma$  making the curve sigmoidal). See **Figure 7** for more details, and see full methods in **Supplementary file 1D**.

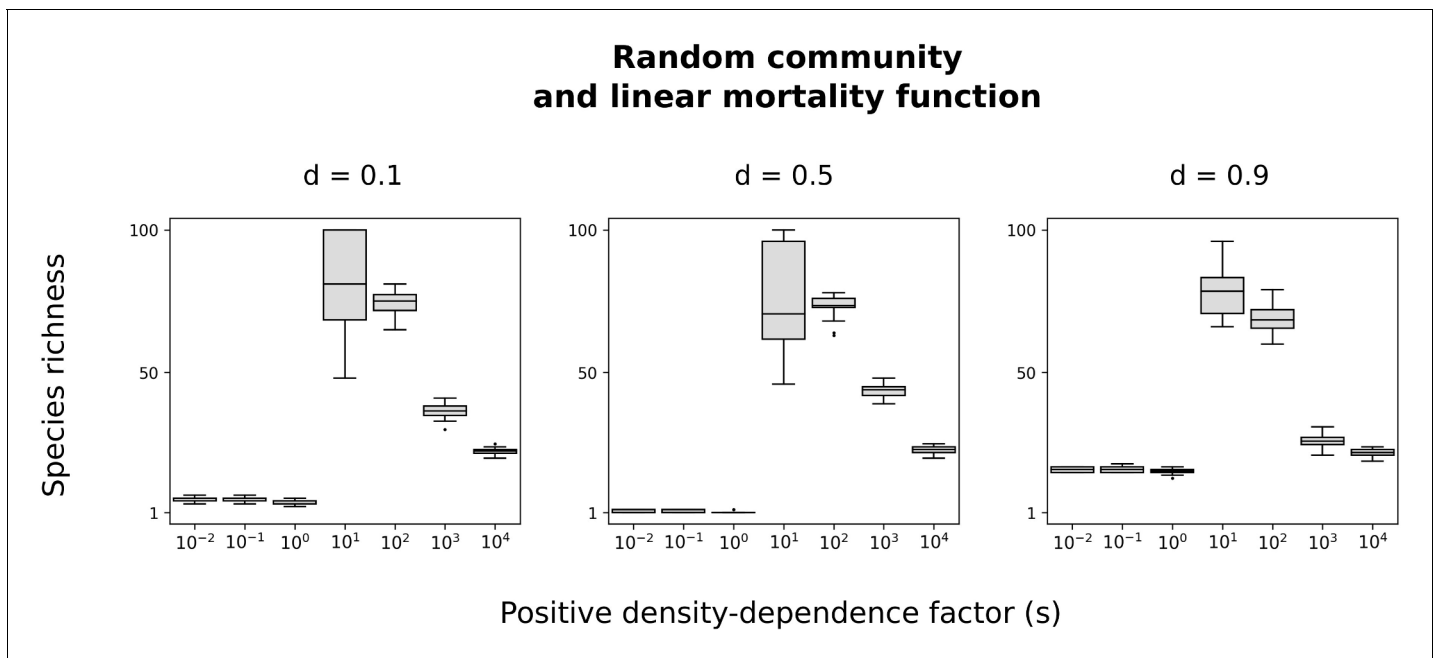

**Figure 7—figure supplement 7.** Random communities with a linear mortality function. Species richness in simulated communities with a linear mortality function. Different minimum basal mortality rates ( $d$ ) are tested, and the linear mortality function  $D(n_i)$  described in **Figure 3—figure supplement 1** (panel f) is implemented. Notably, species richness is high for intermediate  $s$  values. See **Figure 7** for more details, and see full methods in **Supplementary file 1D**.

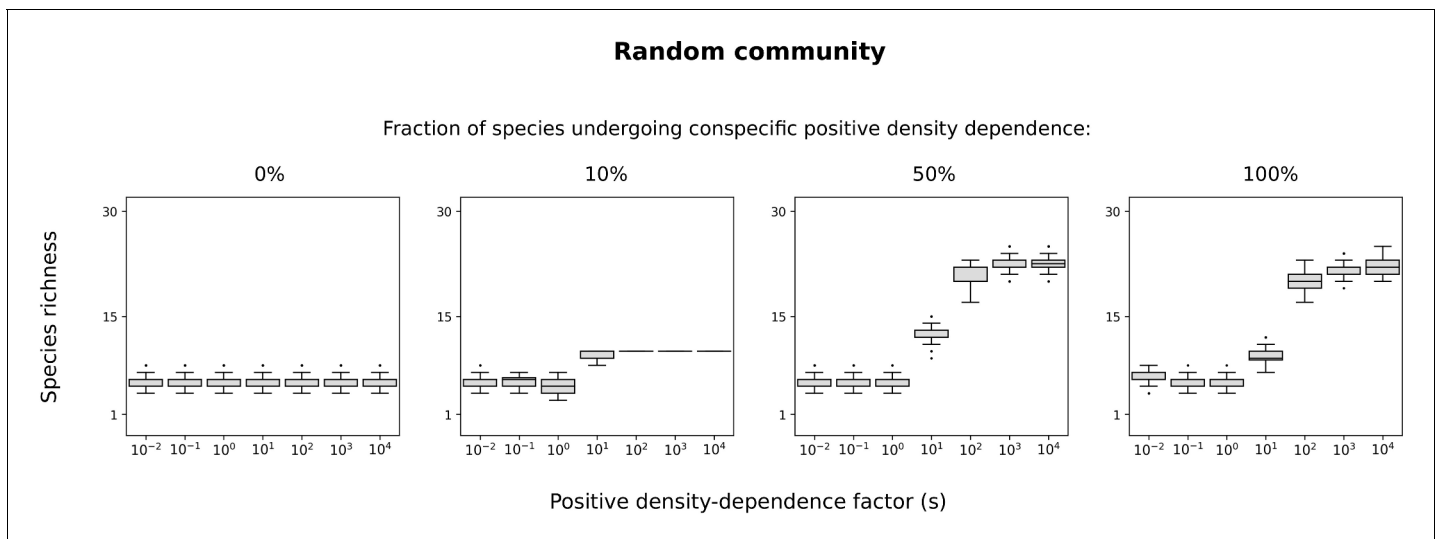

**Figure 7—figure supplement 8.** Random communities with only a fraction of species incurring conspecific positive density dependence. Species richness in simulated communities when only a fraction of species incur conspecific positive density dependence. When a species does not incur conspecific positive density dependence, its density-independent mortality function is set to  $D(n_i) = 1$ . Minimum basal mortality rate:  $d = 0.5$ . See **Figure 7** for more details, and see full methods in **Supplementary file 1D**.

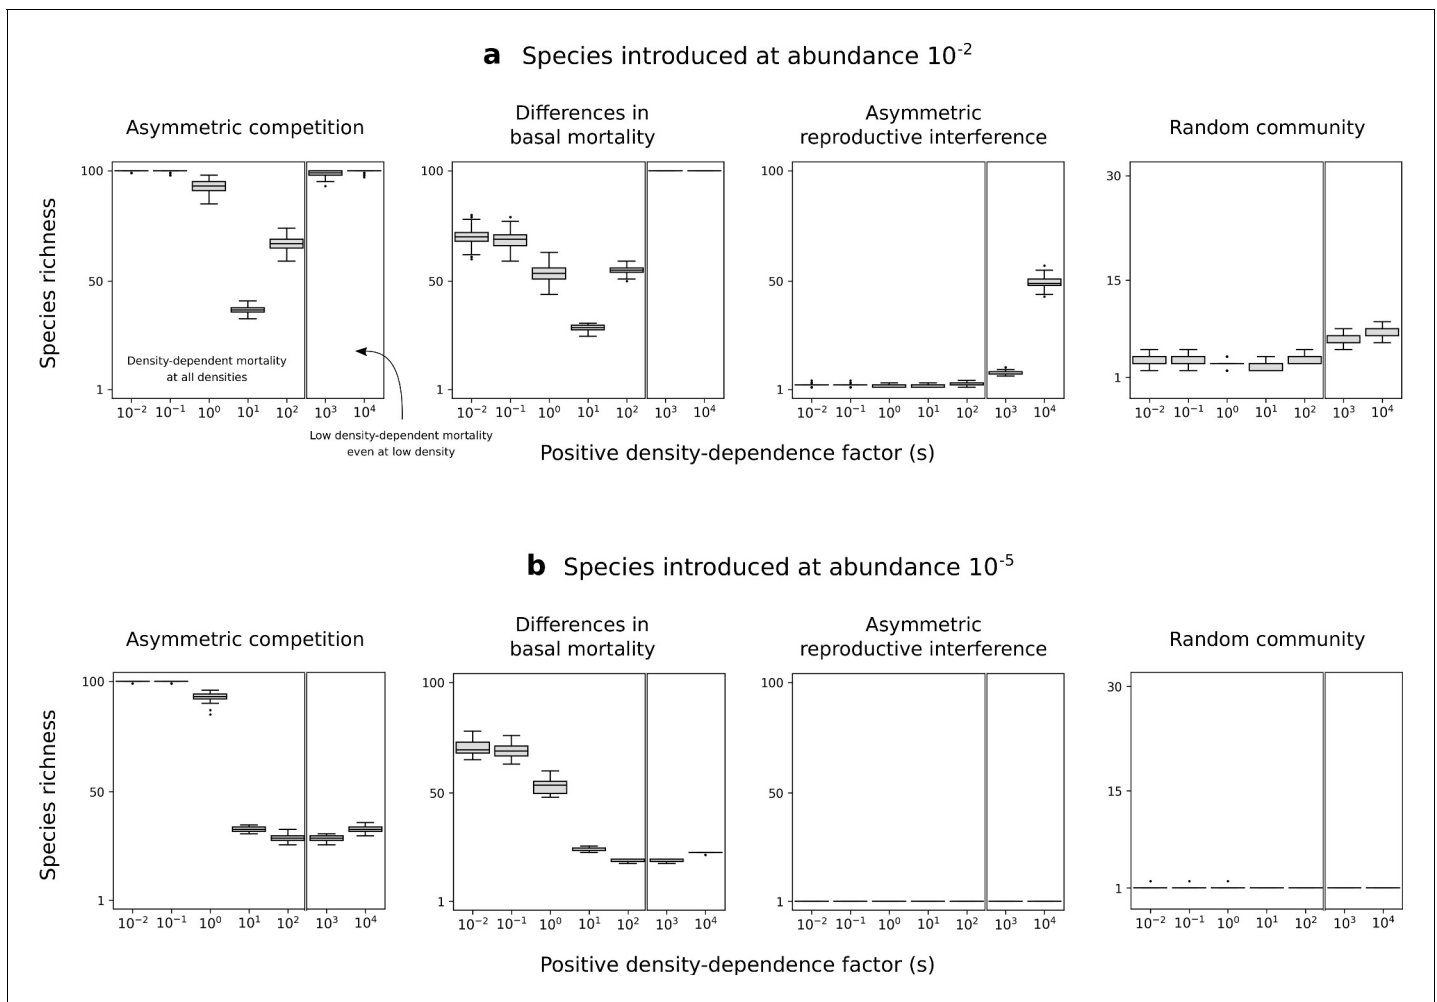

**Figure 7—figure supplement 9.** Random communities when species are introduced one at a time. Species richness in simulated communities when species are introduced one at a time, either at abundance =  $10^{-2}$  (a) or at abundance =  $10^{-5}$  (b). Minimum basal mortality rate:  $d = 0.5$ . See **Figure 7** for more details, and see full methods in **Supplementary file 1D**. Species richness is lower because less competitive species (in the broad sense) may not invade the population. More importantly, conspecific positive density dependence does not help produce species-rich when species are introduced at low density (b).
